1 **Title:** Cortical tracking of continuous speech under bimodal divided attention

2 **Abbreviated title:** Continuous speech processing under bimodal divided attention

3 Zilong Xie<sup>1†</sup>, Christian Brodbeck<sup>2†</sup>, Bharath Chandrasekaran<sup>3</sup>

4 <sup>1</sup>School of Communication Science and Disorders, Florida State University, Tallahassee, FL

5 <sup>2</sup>Department of Psychological Sciences, University of Connecticut, Storrs, CT

6 <sup>3</sup>Department of Communication Science and Disorders, University of Pittsburgh, Pittsburgh, PA

7

8 **Corresponding authors**

9 Zilong Xie ([zx22c@fsu.edu](mailto:zx22c@fsu.edu)); Bharath Chandrasekaran ([b.chandra@pitt.edu](mailto:b.chandra@pitt.edu))

10

11 **Acknowledgments**

12 We thank Rachel Reetzke, Elise LeBovidge, and Jacie McHaney for their assistance with  
13 participant recruitment and data collection. The content is solely the responsibility of the authors  
14 and does not necessarily represent the official views of the National Institutes of Health or the  
15 Natural Science Foundation.

16 **Conflict of Interest:** Authors report no conflict of interest.

17 **Funding sources**

18 This work was supported by the National Institute on Deafness and Other Communication  
19 Disorders-National Institutes of Health (Grant R01DC013315 to B.C). C.B. was supported by  
20 National Science Foundation Grant BCS-1754284. The content is solely the responsibility of the  
21 authors and does not necessarily represent the official views of the National Institutes of Health  
22 or the National Science Foundation.

---

<sup>†</sup> Zilong Xie and Christian Brodbeck should be considered joint first author.

## 23 **Abstract**

24 Speech processing often occurs amidst competing inputs from other modalities, e.g., listening to  
25 the radio while driving. We examined the extent to which *dividing* attention between auditory  
26 and visual modalities (bimodal divided attention) impacts neural processing of natural  
27 continuous speech from acoustic to linguistic levels of representation. We recorded  
28 electroencephalographic (EEG) responses when human participants performed a challenging  
29 primary visual task, imposing low or high cognitive load while listening to audiobook stories as a  
30 secondary task. The two dual-task conditions were contrasted with an auditory single-task  
31 condition in which participants attended to stories while ignoring visual stimuli. Behaviorally,  
32 the high load dual-task condition was associated with lower speech comprehension accuracy  
33 relative to the other two conditions. We fitted multivariate temporal response function encoding  
34 models to predict EEG responses from acoustic and linguistic speech features at different  
35 representation levels, including auditory spectrograms and information-theoretic models of  
36 sublexical-, word-form-, and sentence-level representations. Neural tracking of most acoustic  
37 and linguistic features remained unchanged with increasing dual-task load, despite unambiguous  
38 behavioral and neural evidence of the high load dual-task condition being more demanding.  
39 Compared to the auditory single-task condition, dual-task conditions selectively reduced neural  
40 tracking of only some acoustic and linguistic features, mainly at latencies >200 ms, while earlier  
41 latencies were surprisingly unaffected. These findings indicate that behavioral effects of bimodal  
42 divided attention on continuous speech processing occur not due to impaired early sensory  
43 representations but likely at later cognitive processing stages. Crossmodal attention-related  
44 mechanisms may not be uniform across different speech processing levels.

## 45 **Introduction**

46 Speech processing often occurs amidst competing inputs from other sensory modalities, e.g.,  
47 listening to the radio while driving. In such situations, listeners must allocate attention across  
48 modalities to effectively select the most relevant information within a modality. This raises the  
49 question of whether and how *dividing* attention between modalities (e.g., audition and vision;  
50 bimodal divided attention) affects the processing of natural continuous speech.

51 Resource-based theoretical frameworks have been invoked to scaffold the understanding  
52 of mechanisms governing crossmodal attention (Wahn & König, 2017). Two contrastive  
53 resource-based accounts (modality-specific versus supramodal) yield different hypotheses  
54 regarding the effects of bimodal divided attention on continuous speech processing. Per the  
55 *modality-specific* account, each sensory modality is allocated a limited pool of attentional  
56 resources, and these pools of attentional resources operate independently of each other (Alais et  
57 al., 2006; Arrighi et al., 2011; Duncan et al., 1997; Keitel et al., 2013; Parks et al., 2011; Porcu et  
58 al., 2014). In contrast, per the *supramodal* account, different sensory modalities share a central,  
59 limited pool of attentional resources. The availability of resources to one modality is inversely  
60 related to the amount of resources used by other modalities (Broadbent, 1958; Ciaramitaro et al.,  
61 2017; Klemen et al., 2009; Macdonald & Lavie, 2011; Molloy et al., 2015).

62 Empirical evidence regarding bimodal divided attention effects on speech processing  
63 primarily comes from experimenter-constrained tasks (e.g., Gennari et al., 2018; Kasper et al.,  
64 2014; Mattys et al., 2009, 2014; Mattys & Palmer, 2015; Mattys & Wiget, 2011). Many studies  
65 have shown the detrimental effects of bimodal divided attention on the acoustic processing of  
66 simplified, controlled speech stimuli (e.g., syllable or single words) (Gennari et al., 2018; Mattys  
67 et al., 2014; Mattys & Palmer, 2015; Mattys & Wiget, 2011), which is consistent with the

68 *supramodal* account of attention. Speech processing entails mapping acoustic features into  
69 linguistic representations of increasing complexity (Brodbeck & Simon, 2020; Hickok &  
70 Poeppel, 2007), raising the question of how bimodal divided attention affects linguistic  
71 representations beyond acoustic processing. Behavioral studies with simple speech stimuli  
72 indicate that reduced acoustic processing under bimodal divided attention may lead to  
73 compensatory changes manifested by increased reliance on higher-order linguistic knowledge  
74 during auditory lexical perception (Mattys et al., 2009). However, to date, there is a lack of a  
75 systematic and holistic analysis of divided attention-related changes across different levels  
76 (acoustic-to-linguistic) of natural continuous speech processing, which is distinctly different  
77 from processing simple speech stimuli (Gaston et al., 2022; Hamilton & Huth, 2020).

78         Here, we assessed electroencephalography (EEG) to provide a systematic and holistic  
79 analysis of the acoustic and linguistic processing of continuous speech (Brodbeck & Simon,  
80 2020; Gillis et al., 2022). The continuous speech paradigm uses the multivariate temporal  
81 response function approach (Crosse et al., 2016; Ding & Simon, 2012) to predict neural  
82 responses from a combination of hypothesis-driven acoustic and linguistic properties of  
83 continuous speech. The predictive power of each speech property is used to quantify the  
84 corresponding processing levels (Brodbeck & Simon, 2020; Gillis et al., 2022). The spectro-  
85 temporal acoustic properties included envelope-based spectrogram and acoustic onset  
86 spectrogram. The linguistic properties included measures of informativeness (surprisal and  
87 entropy) based on the information-theoretic framework (Brodbeck et al., 2018). Prior work  
88 suggests that both acoustic and linguistic representations are strongly modulated by *selective*  
89 attention, within the auditory modality and across modalities. Attentional effects are

90 disproportionality more robust on the linguistic representations than acoustic-based  
91 representations (Brodbeck et al., 2018, 2020).

92 Here we integrated the continuous speech paradigm with an audiovisual dual-task  
93 paradigm to examine the effects of bimodal divided attention on the acoustic and linguistic  
94 processing of continuous speech. In the dual-task paradigm, participants performed a challenging  
95 primary visuospatial task that imposed low or high cognitive load while listening to audiobook  
96 stories as a secondary task. The two dual-task conditions were contrasted with an auditory  
97 single-task condition in which participants attended to the story while ignoring visual stimuli.  
98 We hypothesized that compared to the auditory single-task condition, dual-task conditions would  
99 lead to reduced acoustic and linguistic representations of continuous speech, especially at high  
100 cognitive load. However, we hypothesized that linguistic representations may be affected to a  
101 relatively greater extent based on evidence from the literature on selective attention. These  
102 hypotheses are aligned with the *supramodal* account of crossmodal attention.

## 103 **Materials and Methods**

### 104 **Experimental design**

105 Bimodal divided attention was manipulated via a dual-task paradigm. Specifically, participants  
106 performed a primary visuospatial *n*-back task of varying (high or low) cognitive load (Jaeggi et  
107 al., 2007) while listening to continuous speech as a secondary task. We designated the visual task  
108 as the primary task to maximize the chance of observing the bimodal divided attention effects on  
109 continuous speech processing. The cognitive load of the dual-task paradigm was manipulated via  
110 3- and 0-back tasks on the visuospatial stimuli (blue squares; Figure 1A and 1B). The dual-task  
111 conditions were contrasted with an auditory single-task condition (Figure 1C), in which

112 participants explicitly attended to the auditory stimuli while ignoring the visual stimuli. To  
113 obtain a behavioral measure for the auditory task, participants were instructed to respond to two  
114 multiple-choice comprehension questions on the story segments at the end of each trial. Detailed  
115 task instructions are presented in the section on *Experimental procedure*.

116 Each task condition consisted of 15 trials of visual stimuli paired with 15 unique story  
117 segments and were presented in separate blocks. The order of the story segments was fixed and  
118 identical across participants in order to maintain the continuity of the storyline. The order of task  
119 conditions was counterbalanced across participants. Each trial of visual stimuli ended later than  
120 the corresponding story segment. Such offset gaps were not significantly different across task  
121 conditions [ $F(2, 42) = .01, p = .99$ ]. The experiment was controlled with E-Prime 2.0.10  
122 (Schneider et al., 2002).

123

124 **[Fig 1 about here]**

125

126 **Figure 1.** Trial design illustrations for (A) high load dual-task (3-back visual ask), (B) low load  
127 dual-task (0-back visual task), and (C) auditory single-task condition. In the two dual-task  
128 conditions, the primary task was to respond to the visual stimuli and the secondary task was to  
129 attend to auditory stimuli (story segments of about 60 seconds). In the high load condition (A),  
130 participants responded only when the current blue square matched the one 3 positions back  
131 (examples highlighted in red squares). In the low load condition (B), participants responded only  
132 when the current blue square matched the first square in each trial (highlighted in the red square).  
133 In the auditory single-task condition (C), participants were instructed to attend to the auditory

134 stimulus and ignore the visual stimuli. At the end of each trial, participants responded to two  
135 multiple-choice comprehension questions for the story segments. ISI: interstimulus interval.

136

## 137 **Participants**

138 Adult native American English speakers (N = 18) were recruited from the Austin, Texas,  
139 community. Data from one participant were excluded due to technical problems. Data from  
140 another participant were excluded because their story comprehension accuracy was lower for the  
141 auditory single-task condition (66.67%) than the two dual-task conditions (73.37% for low load  
142 and 76.67% for high load). We interpreted this result as that this participant did not understand or  
143 follow the task instructions. The final sample consisted of sixteen participants (18 to 23 years  
144 old; 11 females, five males; 14 right-handed and two left-handed). The sample size was selected  
145 based on prior work examining the effects of bimodal attention on the neural processing of  
146 speech stimuli (e.g., Gennari et al., 2018; Kasper et al., 2014). Previous studies have shown that  
147 music training can influence speech processing (e.g., Bidelman & Alain, 2015). Therefore, we  
148 recruited only participants without a history of or significant formal music training ( $\leq$  four  
149 years of continuous training, not currently practicing). All participants had normal air and bone-  
150 conduction audiometric thresholds, defined as  $\leq$  20 dB hearing level for octave frequencies  
151 from 0.25 to 8 kHz. The thresholds were measured via an Interacoustics Equinox 2.0 PC-Based  
152 Audiometer. Additional inclusion criteria are as follows: no history of psychological or  
153 neurological disorders, no use of neuropsychiatric medication, and having normal or corrected-  
154 to-normal vision. Before the experiment, all participants provided written, informed consent.  
155 Participants received monetary compensation for their participation. The Institutional Review  
156 Board at the University of Texas at Austin approved the experimental protocols.

## 157 **Stimuli and apparatus**

158 The stimuli were composed of visual and auditory materials. The visual stimuli (Figure 1) were  
159 blue squares at one of eight loci around a white fixation cross in the center of a black screen,  
160 adapted from Jaeggi et al. (2007). The duration for individual squares was 500 ms, and the  
161 interval between consecutive squares was 2500 ms. Twenty-three squares were included in a  
162 trial, lasting 69 seconds. The stimuli were displayed on a VIEWPixx/EEG LCD monitor with a  
163 scanning LED-backlight design [29.1 cm (height) × 52.2 cm (width); display resolution: 1920 ×  
164 1080; refresh rate: 120 Hz] at an ~110 cm distance from participants' eyes.

165 The auditory stimuli were English audiobook stories selected from a classic work of  
166 fiction, *Alice's Adventures in Wonderland* (Chapters 1-7, [http://librivox.org/alices-adventures-in-](http://librivox.org/alices-adventures-in-wonderland-by-lewis-carroll-5)  
167 [wonderland-by-lewis-carroll-5](http://librivox.org/alices-adventures-in-wonderland-by-lewis-carroll-5)). The audiobook was narrated by an adult male American English  
168 speaker at a sampling rate of 22.05 kHz. The chapters were divided into 45 segments (each ~60  
169 seconds long). Each segment began where the story ended in the previous segment. In each  
170 segment, silent periods of more than 500 ms were shortened to 500 ms. The story stimuli were  
171 presented diotically via insert earphones (ER-3; Etymotic Research, Elk Grove Village, IL) to  
172 the participants at a 70 dB sound pressure level. A trial of visual stimuli (23 blue squares) was  
173 presented concurrently with each story segment, with the segment beginning later (3 seconds  
174 after the onset of the visual trial) and ending earlier relative to the visual trial.

## 175 **Experimental procedure**

### 176 **High and low load dual-task**

177 The cognitive load of the dual-task conditions was manipulated via the visual task. For the high  
178 load condition, the visual task required participants to respond when the current blue square  
179 matched the one three-position back in the sequence (i.e., 3-back task, Figure 1A). For the low



180 load condition, the visual task required participants to respond when the current blue square  
181 matched the first square in the sequence (i.e., 0-back task, Figure 1B). We randomized the  
182 location of the first square across trials. Matched squares were treated as targets, and unmatched  
183 ones were non-targets. Note that targets could appear only starting from the fourth square in the  
184 sequence for a given trial in the 3-back task. In other words, targets would be among the last 20  
185 squares in the sequence on a given trial. We designed the 0-back task to match that. Six of the  
186 last 20 squares were set as targets for both task conditions, and the remaining 14 were non-  
187 targets. The target locations were randomized across trials.

188 Participants responded to the targets by pressing buttons on a game controller.  
189 Participants were told that speed and accuracy were equally important. Participants were  
190 required to rest their fixations on a white cross in the middle of the screen. To encourage  
191 engagement, accuracy feedback on the visual task was displayed after their responses. The  
192 number of button presses was not significantly different between 3- and 0-back visual tasks  
193 [ $t(15) = .96, p = .36$ ]. After the visual task, participants responded to two multiple-choice  
194 comprehension questions for the auditory stories. Participants had unlimited time to respond to  
195 the story questions. No feedback was provided after their responses.

196 Critically, to manipulate the priority of the auditory and visual tasks, participants were  
197 instructed to focus primarily on the visual task and attend to the auditory stimulus as a secondary  
198 task. They were explicitly told that their data could not be used if their performance on the visual  
199 task was poor.

## 200 **Auditory single-task**

201 In this condition, participants were instructed to focus on the story segments and ignore the  
202 visual stimuli (Figure 1C). Participants were required to keep their eyes open and rest their

203 fixations on a white cross in the middle of the screen. At the end of each trial, participants  
204 responded to two multiple-choice questions to assess their comprehension of the story segments.  
205 Participants had unlimited time to respond to questions. Visual feedback about the accuracy of  
206 the story question was displayed following their responses.

## 207 **Electrophysiological data acquisition and preprocessing**

### 208 **Acquisition**

209 The experiment was conducted in a dark, acoustically shielded booth. Participants were seated in  
210 a comfortable chair during tasks. Electroencephalography (EEG) data were recorded using the  
211 Easycap recording cap ([www.easycap.de](http://www.easycap.de)) with 64 actiCAP active electrodes (Brain Products,  
212 Gilching, Munich, Germany) at a sampling rate of 5 kHz. The electrode locations were  
213 determined according to the extended 10-20 system (Oostenveld & Praamstra, 2001), with a  
214 common ground at the Fpz electrode site and TP9 as the reference. The electrode impedances  
215 were below 20 k $\Omega$ .

216 The EEG data were acquired using BrainVision actiCHamp amplifier (Brain Products, Gilching,  
217 Munich, Germany) linked to BrainVision Pycorder software 1.0.7.

### 218 **Preprocessing**

219 The EEG data were preprocessed offline in MNE-Python (Gramfort et al., 2013), and the  
220 deconvolution analysis was implemented with the Eelbrain package (Brodbeck et al., 2021). The  
221 data were re-referenced to the average of the electrodes TP9 and TP10, and then band-pass  
222 filtered from 1 to 15 Hz using a zero-phase overlap-add finite impulse response filter (hamming  
223 window) with default settings in MNE-Python. Independent component analysis was applied to  
224 EEG data combined across the three task conditions in individual participants using the

225 extended-infomax algorithm. Artifact-related components (mainly ocular artifacts) were  
226 identified according to the topographical distribution and time course via visual inspection and  
227 then removed. After that, the EEG data were segmented into epochs that were time-locked to the  
228 onsets of corresponding story segments, and then downsampled to 100 Hz. The maximum  
229 possible duration of the epochs was set to 61 seconds.

## 230 **Assessing neural tracking of visual and auditory stimuli**

231 To assess the neural representation of speech, we used the multivariate temporal response  
232 function (mTRF) approach (Crosse et al., 2016; Ding & Simon, 2012). In this approach, the EEG  
233 signal is predicted using time-delayed multiple regression. We first generated several visual,  
234 acoustic, and linguistic models (see below). Each model was used to define several predictor  
235 variables, each implementing a specific linking hypothesis for predicting brain activity from the  
236 corresponding model. We then tested the predictive power of different combinations of predictor  
237 variables to evaluate which acoustic and linguistic models are associated with predictive power  
238 for the EEG data. Each predictor variable thus operationalizes a hypothesis that EEG responses  
239 are modulated by a given property of the speech signal, which would indicate neural  
240 representations arising from a corresponding acoustic or linguistic model. Figure 2 displays an  
241 example of each predictor variable. In the following paragraphs, we provide more detailed  
242 descriptions.

243 **[Fig 2 about here]**

244

245 **Figure 2.** An excerpt of raw EEG responses from all 64 electrodes (top row) and the predictor  
246 variables (subsequent rows) used to model the EEG responses. Note that visual predictors consist

247 of a separate one-dimensional array with impulses for onsets and offsets of the blue squares.  
248 They are combined into a single predictor in this example for illustration purposes.

249

## 250 **Visual model**

251 Because the visual stimuli were temporally sparse, visual responses were modeled analogously  
252 to a visual evoked potential. The visual predictor was a one-dimensional time series with an  
253 impulse at the onsets and offsets of the blue squares. We did not separate predictors for targets  
254 and non-targets because this study was not intended to explore differences in neural processing  
255 of visual targets and non-targets, and thus there were not enough targets to estimate stable  
256 responses.

## 257 **Acoustic model**

258 The acoustic model was designed to assess EEG responses related to representations of acoustic  
259 spectro-temporal features. All acoustic predictors were derived from 256-band gammatone-based  
260 spectrograms of the speech stimuli, with cut-off frequencies from 0.02 to 5 kHz. The 256-band  
261 spectrograms were downsampled to 1 kHz and scaled with an exponent of 0.6. A *spectrogram*  
262 predictor was then created by summing the 256-band spectrograms in eight logarithmically  
263 spaced frequency bands. In addition, an *onset spectrogram* predictor was defined to detect and  
264 control for representations of acoustic edges. These were generated using an auditory edge  
265 detection model (Brodbeck et al., 2020; Fishbach et al., 2001) and applied to each frequency  
266 band of the 256-band spectrograms. The onsets across these 256 bands were also summed into  
267 eight logarithmically spaced frequency bands to generate 8-band onset spectrogram predictors.

## 268 **Linguistic models**

269 Linguistic processing was assessed using information-theoretic models. These models assume  
270 that listeners maintain predictive models of speech, which can be linked to brain activity through  
271 surprisal and entropy measures (Brodbeck et al., 2018). Previous work suggests that listeners  
272 maintain multiple such predictive models, differing in complexity, in parallel (Brodbeck et al.,  
273 2022). The predictive models were all defined over phoneme sequences, determined for each  
274 stimulus via forced alignment using the Montreal Forced Aligner (MFA) (McAuliffe et al.,  
275 2017). The predictors based on the specific information-theoretic models (described in  
276 subsequent sections) all consisted of time series with an impulse of variable size at each  
277 phoneme onset. In order to provide a control for responses related to linguistic segmentation, two  
278 additional predictors were included: A *word onset* predictor with a unit (value of 1) impulse at  
279 the onset of each word-initial phoneme and a *phoneme onset* predictor with a unit impulse at the  
280 onsets of all other phonemes.

281 **Sublexical model.** The sublexical model assumes that listeners predict upcoming  
282 phonemes or speech sounds based on a local context, consisting of only a few preceding sounds.  
283 To implement such a model, all sentences from the SUBTLEX-US corpus (Keuleers et al., 2010)  
284 were transcribed into phoneme sequences without word boundary markers, and a 5-gram model  
285 (Heafield, 2011) was trained on these phoneme sequences. This model was then applied to the  
286 experimental stimuli to compute a probability distribution over phonemes at each phoneme  
287 position, conditional on the four preceding phonemes. This distribution was used to calculate a  
288 *sublexical surprisal* predictor (the surprisal of encountering phoneme  $ph_k$  at position  $k$  in the  
289 stimulus is  $-\log_2(p(ph_k|context))$ ), and a *sublexical entropy* predictor (the entropy at  
290 phoneme position  $ph_k$  reflects the uncertainty about what the next phoneme,  $ph_{k+1}$ , will be  
291  $-\sum_{ph}^{phonemes} p(ph_{k+1} = ph|context)\log_2 p(ph_{k+1} = ph|context)$ ). Surprisal is a measure of

292 the amount of new information provided by a stimulus; a response to sublexical surprisal is thus  
293 evidence that listeners integrate information on a sublexical level. A response to entropy  
294 additionally suggests that listeners create a probabilistic expectation about future input before  
295 encountering the phoneme (Pickering & Gambi, 2018). A response to either of those predictors  
296 would provide evidence that listeners maintain a sublexical language model.

297 **Word-form model.** The word-form model aims to predict the surface form of the word  
298 that is currently being heard, but without access to any information preceding the word. To  
299 implement this model, a phonological lexicon was generated by combining pronunciations from  
300 the MFA English dictionary and the Carnegie Mellon University Pronouncing Dictionary  
301 (<http://www.speech.cs.cmu.edu/cgi-bin/cmudict>). The word-form model was implemented based  
302 on the cohort model of word recognition (Brodbeck et al., 2018; Marslen-Wilson, 1987). Each  
303 word was assigned a prior probability based on its count frequency in the SUBTLEX corpus  
304 (Keuleers et al., 2010), substituting a count of 1 for missing words. For each word in the speech  
305 stimuli, the cohort model was then implemented by starting with the complete lexicon and, for  
306 each subsequent phoneme of the word, incrementally removing words that were not compatible  
307 with that phoneme in that position. The changing probability distribution over the lexicon was  
308 then used to define two predictors, each with a value at each phoneme position: *phoneme*  
309 *surprisal* (log inverse of the posterior probability of the phoneme given the preceding phonemes)  
310 and *cohort entropy* (Shannon entropy over all words currently in the cohort,  
311  $\sum_{word}^{lexicon} p(word|context) \log_2 p(word|context)$ ). This model implements the hypothesis that  
312 listeners recognize words using a probabilistic model that takes into account all the information  
313 since the last word boundary (i.e., where the word started), but that does not further take into  
314 account any context when considering possible word forms as candidates.

315           **Sentence model.** The sentence model is very similar to the word-form model, with the  
316 only difference being that the prior expectation for each word is modulated by the sentence  
317 context. To implement this, a lexical 5-gram model (Heafield, 2011) was trained on the whole  
318 SUBTLEX-US database (Keuleers et al., 2010). This 5-gram model was used to set the prior  
319 probability for each word in the lexicon based on the preceding four words before applying the  
320 procedure described for the word-form model above. The same two linking hypotheses were  
321 used to define predictor variables (*phoneme surprisal* and *cohort entropy*). The sentence model  
322 implements the hypothesis that listeners use a wider context including multiple words, when  
323 modulating their phoneme-by-phoneme perception and expectations.

### 324 **Estimation of neural tracking**

325 We used forward encoding mTRF models to predict EEG responses from the predictors  
326 described above. The mTRF models were fitted to the EEG responses at individual electrodes  
327 using the boosting algorithm implemented in the Eelbrain toolbox (Brodbeck et al., 2021). The  
328 predictive power of the mTRF models was evaluated by how accurately they could predict EEG  
329 responses from novel trials of the same condition. This was quantified through the  $z$ -transformed  
330 Pearson's correlation coefficient between predicted and actual EEG responses (i.e., prediction  
331 accuracy). Higher prediction accuracy indicates better neural tracking of the corresponding  
332 predictor.

333           The mTRFs were estimated separately for each subject and condition using a 5-fold  
334 cross-validation strategy. First, the trials were divided into 5 test sets. For each test set, EEG  
335 responses were predicted from the average of 4 mTRF models, estimated from the remaining 4  
336 datasets, each with 3 of the remaining 4 sets serving as training data, and one as validation set.  
337 The mTRFs were generated from a basis of 50 ms Hamming windows with stimulus-EEG lag

338 from -100 to 500 ms (window center). The mTRFs were estimated jointly for all predictors with  
339 coordinate descent to minimize the  $\ell_1$  error. After each step, the change in error was evaluated in  
340 the validation set, and if there was an increase in error, the TRF for the predictor responsible for  
341 the change was frozen (in its state before the change). This continued until the whole mTRF was  
342 frozen. A single measure of prediction accuracy (fisher  $z$ -transformed correlation between  
343 predicted and measured response, see above) was calculated after concatenating the predicted  
344 responses from the 5 test sets. For analysis of the response functions, the mTRFs were averaged  
345 across all the test sets. For the visual predictor, the TRFs to onsets and offsets were combined for  
346 an effective response function with lags from -100 to 1000 ms relative to visual stimulus onset  
347 (because the visual stimulus always lasted exactly 500 ms).

348 To estimate the neural tracking of a given predictor (or a combination of predictors), we  
349 calculated the change in prediction accuracy (i.e.,  $\Delta z$ ) when the predictor(s) of interest was(ere)  
350 removed from the full model that included all the visual, acoustic, and linguistic predictors. This  
351 procedure tests for variability in the responses that can be *uniquely* attributed to the predictor(s)  
352 under investigation and cannot be explained by any other predictors. Such a strong test is  
353 warranted because different properties of natural, connected speech tend to be correlated in time.  
354 Note that the analysis of the mTRFs themselves could not implement such strict control, and thus  
355 we cannot exclude the possibility that response functions include components that are  
356 confounded with other, correlated speech features. For this reason we focus our interpretation on  
357 tests of predictive power more than mTRF comparisons.

## 358 **Statistical analysis**

359 All statistical analyses, if unspecified, were implemented in the R software (version 4.2.1; Team,  
360 2022).



361 First, we examined the effect of task condition (auditory single-task, or low or high load  
362 dual-task) on behavioral performance, and neural visual, acoustic, and linguistic processing  
363 separately. A paired T-test (two-sided), or one- or two-way repeated-measures analysis of  
364 variance (ANOVA), whichever was appropriate, was performed with an alpha level of .05. The  
365 reported  $p$  values of those analyses were adjusted using the False Discover Rate (FDR) method  
366 (Benjamini & Hochberg, 1995). We also calculated effect sizes [Cohen's  $d$  for T-tests and partial  
367 eta squared ( $\eta^2_p$ ) for ANOVAs] and Bayes Factors (BF). The Bayes Factors were computed  
368 using appropriate functions from the R package 'BayesFactor' (version 0.9.12.4.4; Morey et al.,  
369 2022). Post hoc analysis, if necessary, was performed using paired T-tests (two-sided). FDR-  
370 corrected  $p$  values, effect sizes (Cohen's  $d$ ), and Bayes Factors (BF) were reported. More  
371 analysis details are provided in the following paragraphs.

372 Behavioral performance was quantified by three measures, including the accuracy and  
373 reaction time (RT) for the visual task and the accuracy for the auditory task. Visual accuracy was  
374 calculated as the difference in hit rates (i.e., correctly responding to a target) and false alarm  
375 rates (i.e., identifying a non-target as being a target). Visual RT was calculated as the median RT  
376 for hits only (Jaeggi et al., 2007; Snodgrass & Corwin, 1988). Auditory accuracy was calculated  
377 as the percentage of correctly answered story questions.

378 The extent of neural visual processing was determined using a mass-univariate analysis,  
379 comparing the predictive power ( $z$ ) between the full model and a model missing the visual  
380 predictor. For this, we averaged the prediction accuracy for visual predictors across task  
381 conditions at individual electrodes and tested whether the averaged difference in prediction  
382 accuracy ( $\Delta z$ ) was greater than zero using a mass-univariate, one-sample T-test (one-sided). This  
383 was implemented in the Eelbrain package. The mass-univariate test was a cluster-based

384 permutation test, using a  $t$ -value equivalent to uncorrected  $p \leq 0.05$  as the cluster-forming  
385 threshold. A corrected  $p$ -value was computed for each cluster based on the cluster-mass statistic  
386 in a null distribution from 10,000 permutations (or a complete set of all possible permutations, in  
387 cases where this was fewer than 10,000) (Maris & Oostenveld, 2007). We reported the largest  $t$   
388 value from the cluster, i.e.,  $t_{max}$ , as an estimate of effect size (Brodbeck et al., 2018). Neural  
389 acoustic and linguistic processing were analyzed in the same manner.

390 We followed each of these analyses by examining the extent to which task conditions  
391 modulated neural tracking of individual predictors, or subsets of predictors. To this end we used  
392 the significant cluster from the mass-univariate analysis as region of interest (ROI) to extract  $\Delta z$   
393 values averaged across the electrodes in the cluster, but for each condition separately. Regarding  
394 neural acoustic processing, we examined the spectrogram and onset spectrogram predictors  
395 separately. Regarding neural linguistic processing, we conducted three sets of analyses to  
396 examine individual linguistic predictors. First, a two-way repeated-measures ANOVA was  
397 performed to examine the effects of context levels (sublexical, word-form, and sentence) and  
398 task condition on prediction accuracy. Second, a two-way repeated-measures ANOVA was  
399 performed to examine the effects of predictor type (entropy and surprisal) and task condition on  
400 prediction accuracy. Third, a one-way repeated-measures ANOVA was performed to examine  
401 the effect of task condition on the prediction accuracy of word onsets. Further, if a significant  
402 effect of task condition was observed from any of those analyses, we conducted follow-up  
403 analyses to examine whether task conditions eliminated neural tracking of the corresponding  
404 predictor(s) by testing whether the prediction accuracy at individual task conditions was greater  
405 than zero using one-sample T-tests (one-sided).

406 Finally, we examined the effect of task conditions on the mTRFs from predictors which  
 407 showed significant task conditions effects on prediction accuracy. The predictors include visual  
 408 predictors, onset spectrogram, three context levels (sublexical, word-form, and sentence), and  
 409 two predictor types (entropy and surprisal). We calculated the global field power (GFP) of  
 410 mTRFs across the corresponding ROI from the above analyses of prediction accuracy. We then  
 411 compared the GFP of mTRFs between task conditions using mass-univariate paired T-tests (two-  
 412 sided). The mTRF analyses were implemented in the Eelbrain package with default parameters  
 413 except for the analysis time window. For visual predictors, we concatenated the mTRFs for  
 414 visual onsets and offsets to analyze the response to visual stimuli as a whole. For the onset  
 415 spectrogram, we averaged the mTRFs across the eight frequency bands. The analysis time  
 416 window was 0 to 1000 ms for visual predictors and 0 to 450 ms for auditory predictors.

## 417 Results

418  
 419 Table 1 summarizes the key findings regarding the effect of task condition on behavioral  
 420 performance, and neural visual, acoustic, and linguistic processing.

421 **Table 1. Task Effects on Continuous Speech Processing**

| Type                  | Measure           |                       | Key Result                                  |
|-----------------------|-------------------|-----------------------|---------------------------------------------|
| Behavioral            | Visual accuracy   |                       | Low load > High load                        |
|                       | Visual RT         |                       | Low load < High load                        |
|                       | Auditory Accuracy |                       | Auditory single-task = Low load > High load |
| Neural ( $\Delta z$ ) | Visual            |                       | Auditory single-task < Low load < High load |
|                       | Acoustic          | Gammatone spectrogram | No significant task effect                  |
|                       |                   | Onset spectrogram     | Auditory single-task > Low load = High load |

|  |            |                                             |                                                                |
|--|------------|---------------------------------------------|----------------------------------------------------------------|
|  |            | Sublexical, word-form, and sentence context | Auditory single-task > Low load = High load                    |
|  | Linguistic | Entropy and surprisal                       | <i>Entropy</i> : Auditory single-task > Low load = High load   |
|  |            |                                             | <i>Surprisal</i> : Auditory single-task > Low load = High load |
|  |            | Word onset                                  | No significant task effect                                     |

422 **Divided attention and visual load impair behavioral performance**

423 Figure 3A and 3B display the accuracy and RT of the visual task for individual participants.  
 424 Compared to the low load (0-back) condition, the high load (3-back) condition was associated  
 425 with lower accuracy [low load: mean = 99.54% ( $SD = 0.82$ ) vs. high load: mean = 63.31% ( $SD =$   
 426  $21.85$ ),  $t(15) = 6.60$ ,  $p < .001$ , Cohen's  $d = 1.65$ ,  $BF = 2.59 \times 10^3$ ] and slower RT [low load:  
 427 mean = 453.11 ms ( $SD = 67.54$ ) vs. high load: mean = 785.24 ms ( $SD = 233.41$ ),  $t(15) = -5.33$ ,  $p$   
 428  $< .001$ , Cohen's  $d = 1.33$ ,  $BF = 330.30$ ]. These results confirmed that the manipulation of  
 429 cognitive load in the visual task was successful.

430

431 **[Fig 3 about here]**

432

433 **Figure 3.** Behavioral performance on visual and auditory tasks. (A) Accuracy on the low load  
 434 (0-back) and high load (3-back) visual tasks, which was calculated as the difference in hit rates  
 435 (i.e., correctly responding to a target) and false alarm rates (i.e., identifying a non-target as being  
 436 a target). (B) Reaction time (RT) on the low load (0-back) and high load (3-back) visual tasks,  
 437 which was calculated for hits only. (C) Accuracy on the auditory task, which was calculated as  
 438 the percentage of correctly answered story questions. Individual lines in (A) to (C) denote  
 439 individual participants ( $n = 16$ ). (D) Correlation between the change in auditory accuracy [i.e.,

440 (low load – high load)/low load] and the change in visual RT [i.e., (high load – low load)/low  
441 load]. The gray line is the linear regression line. N.s.  $p > .05$ , \*\*\*  $p < .001$ .

442

443

444 Figure 3C displays the auditory task accuracy for individual participants. The mean  
445 accuracy was 88.96% ( $SD = 5.93$ ) in the auditory single-task condition, 84.58% ( $SD = 11.86$ ) in  
446 the low load dual-task condition, and 65.63% ( $SD = 12.75$ ) in the high load dual-task condition.  
447 The effect of task condition was significant [ $F(2,30) = 36.59$ ,  $p < .001$ ;  $\eta^2_p = .71$ ,  $BF = 6.75 \times$   
448  $10^6$ ]. Post hoc analysis revealed that auditory task accuracy was significantly lower in the high  
449 load dual-task condition compared to the other two conditions: vs. auditory single-task,  $t(15) =$   
450  $7.38$ ,  $p < .001$ , Cohen's  $d = 1.84$ ,  $BF = 8.31 \times 10^3$ ; vs. low load dual-task,  $t(15) = 6.34$ ,  $p < .001$ ,  
451 Cohen's  $d = 1.58$ ,  $BF = 1.70 \times 10^3$ . The auditory task accuracy was not significantly different  
452 between auditory single-task and low load dual-task conditions [ $t(15) = 1.75$ ,  $p = .10$ , Cohen's  $d$   
453  $= 0.44$ ,  $BF = 0.88$ ].

454 Further, we examined the relationship between visual and auditory task performance  
455 during the dual-task conditions. The change in auditory accuracy [i.e., (low load – high load)/low  
456 load] was negatively correlated with the change in visual RT [i.e., (high load – low load)/low  
457 load] (Spearman's  $\rho = -.46$ , uncorrected  $p = .038$ , one-sided; Figure 3D), such that listeners who  
458 slowed down more on the visual task from low to high load conditions tended to have a smaller  
459 drop in auditory accuracy. The change in auditory accuracy was not significantly correlated with  
460 the change in visual accuracy (Spearman's  $\rho = -.29$ , uncorrected  $p = .28$ , one-sided).

461 These results demonstrate that divided (vs. selective) attention and increasing visual load  
462 impair behavioral visual and auditory performance.

463 **Neural tracking of visual stimuli is strongly modulated by divided**  
464 **attention and visual load**

465 To assess neural tracking of visual stimuli, we focused on the predictive power of visual  
466 predictors while controlling for all speech-related predictors (acoustic and linguistic). Adding  
467 predictors for visual stimuli to a model including only speech predictors significantly improved  
468 its predictive power (prediction accuracy averaged across task conditions;  $t_{\max} = 12.93$ ,  $p < .001$ ),  
469 providing evidence for neural tracking of visual stimuli. The cluster-based test resulted in a  
470 single significant cluster that spread across all electrodes, with the largest effects on parietal and  
471 occipital electrodes (Figure 4A).

472

473 **[Fig 4 about here]**

474

475 **Figure 4. Neural tracking of visual stimuli across task conditions.** Visual stimuli were  
476 associated with a robust response, which further increased with task-relevance and -load. (A)  
477 Topography showing the increase in prediction accuracy ( $\Delta z$ ) due to visual predictors, which  
478 was significantly above zero in a single cluster encompassing the highlighted (yellow)  
479 electrodes. (B) Prediction accuracy across task conditions. Blue lines denote individual  
480 participants: Thicker lines indicate higher prediction accuracy for the high vs. low load  
481 condition, and thinner lines indicate lower accuracy for the high vs low load condition. Red  
482 asterisks denote  $p$  values for comparison between conditions. Error bars denote the 95% within-  
483 subject confidence interval (Loftus & Masson, 1994). (C) Global field power (GFP) of the visual  
484 temporal response functions (TRFs). Visual stimuli lasted from 0 to 500 ms. Shaded areas denote  
485 within-subject standard errors around the mean (for color labels see panel B). Horizontal lines  
486 denote time windows in which TRFs were significantly different between conditions. (D)

487 Topographies of selected times in panel C (grey vertical lines). A-ST: auditory single-task, Lo-  
488 DT: low load dual-task, Hi-DT: high load dual-task. \*\*  $p < .01$ , \*\*\*  $p < .001$ .

489

490

491 Importantly, the predictive power of the visual predictors was modulated by task  
492 condition [ $F(2,30) = 46.10$ ,  $p < .001$ ,  $\eta^2_p = .76$ ,  $BH = 6.09 \times 10^7$ ]. As shown in Figure 4B, the  
493 high load dual-task condition was associated with the highest predictive power (mean = 0.075,  
494  $SD = 0.029$ ), followed by the low load dual-task condition (mean = 0.053,  $SD = 0.022$ ), and  
495 lowest for the auditory single-task condition (mean = 0.020,  $SD = 0.012$ ): high load dual-task vs.  
496 auditory single-task,  $t(15) = 9.52$ ,  $p < .001$ , Cohen's  $d = 2.38$ ,  $BF = 1.50 \times 10^5$ ; high load dual-  
497 task vs. low load dual-task,  $t(15) = 3.34$ ,  $p = .005$ , Cohen's  $d = .84$ ,  $BF = 10.7$ ; low load dual-  
498 task vs. auditory single-task,  $t(15) = 6.64$ ,  $p < .001$ , Cohen's  $d = 1.66$ ,  $BF = 2.72 \times 10^3$ . Together,  
499 these results suggest that neural tracking of visual stimuli was successively enhanced with  
500 increasing load of the visual task.

501 We analyzed mTRFs to further clarify how the difference in model predictive power was  
502 reflected in brain responses. Visual mTRFs can be conceptualized as evoked responses to the  
503 visual stimuli. Consistent with results for prediction accuracy, the mTRFs were also modulated  
504 by the task condition (Figure 4C). The high load dual-task condition showed larger mTRF  
505 amplitudes than the auditory single-task condition from 0 to 680 ms ( $p < .001$ ) and the low load  
506 dual-task condition from 190 to 380 ms ( $p < .001$ ). The mTRF amplitudes for the low load dual-  
507 task condition were larger than the auditory single-task condition from 70 to 210 ms ( $p = .009$ )  
508 and from 260 to 600 ms ( $p < .001$ ).

509 **Divided attention, but not visual load, reduces late neural tracking**  
510 **of acoustic features**

511 The acoustic predictors significantly contributed to model prediction beyond the visual and  
512 linguistic predictors in a cluster that spread across almost all electrodes, with maxima at temporal  
513 sites ( $t_{\max} = 12.00$ ,  $p < .001$ ; Figure 5A). As expected, these results provide evidence for robust  
514 neural tracking of acoustic properties of speech.

515

516 **[Fig 5 about here]**

517

518 **Figure 5. Neural tracking of acoustic information across task conditions.** (A) Increase in  
519 prediction accuracy ( $\Delta z$ ) due to acoustic predictors of speech (gammatone and onset  
520 spectrogram), which was significantly above zero in a cluster encompassing the highlighted  
521 (yellow) electrodes. Blue dots denote individual participants. (B) Prediction accuracy across task  
522 conditions for acoustic predictors, i.e., combined gammatone and onset spectrogram. (C) and (D)  
523 Prediction accuracy across task conditions for gammatone spectrogram and onset spectrogram  
524 separately. Topographies highlight electrodes (yellow) with prediction accuracy that was  
525 significantly above zero. Black asterisks denote  $p$  values for testing against (above) zero at  
526 individual conditions. (B) to (D) Blue lines denote individual participants: Thicker lines indicate  
527 lower accuracy for high vs. low load condition, and thinner lines indicate higher accuracy for  
528 high vs. low load condition. Red asterisks denote  $p$  values for comparison between conditions.  
529 Error bars denote 95% confidence interval. (E) and (F) Global field power (GFP; top) of mTRFs  
530 and related topographies (bottom) for gammatone and onset spectrogram. The mTRFs were  
531 averaged across the eight frequency bands. Shaded areas denote within-subject standard errors  
532 around the mean. Horizontal lines denote time windows in which mTRFs were significantly



533 different between conditions. Topographies are shown for selected times indicated in GFPs (grey  
534 vertical lines). A-ST: auditory single-task, Lo-DT: low load dual-task, Hi-DT: high load dual-  
535 task. \*  $p < .05$ , \*\*  $p < .01$ , \*\*\*  $p < .001$ .

536

537

538

539 The prediction accuracy for acoustic predictors was modulated by task condition [ $F(2,30)$   
540 = 14.83,  $p < .001$ ,  $\eta^2_p = .50$ , BF = 581.38; Figure 5B]. Post hoc analysis showed that the  
541 prediction accuracy significantly dropped in the two dual-task conditions compared to the  
542 auditory single-task condition [vs. low load dual-task,  $t(15) = 3.84$ ,  $p = .002$ , Cohen's  $d = 0.96$ ,  
543 BF = 25.60; vs. high load dual-task,  $t(15) = 4.78$ ,  $p < .001$ , Cohen's  $d = 1.20$ , BF = 130.60]. The  
544 prediction accuracy was not significantly different between the dual-task conditions [ $t(15) = .77$ ,  
545  $p = .45$ , Cohen's  $d = 0.19$ , BF = 0.33]. These results suggest that neural tracking of acoustic  
546 information was reduced when directing attention from one task (auditory) to two tasks (visual  
547 and auditory).

548 Then, we assessed whether the effect of task condition could be attributed to specific  
549 acoustic predictors. The two acoustic predictors both independently contributed to overall model  
550 prediction (gammatone spectrogram:  $t_{\max} = 6.08$ ,  $p < .001$ , Figure 5C; onset spectrogram:  $t_{\max} =$   
551 9.91,  $p < .001$ , Figure 5D). The effect of task condition on the prediction accuracy was  
552 significant for onset spectrogram [ $F(2,30) = 4.93$ ,  $p = .033$ ,  $\eta^2_p = 0.25$ , BF = 4.17] but not for  
553 gammatone spectrogram [ $F(2,30) = .70$ ,  $p = .59$ ,  $\eta^2_p = 0.04$ , BF = 0.26]. Post hoc analysis  
554 revealed that the prediction accuracy for onset spectrogram significantly dropped in the two  
555 dual-task conditions compared to the auditory single-task condition [vs. low load dual-task,  $t(15)$

556 = 2.61,  $p = .030$ , Cohen's  $d = 0.65$ ,  $BF = 3.14$ ; vs. high load dual-task,  $t(15) = 2.89$ ,  $p = .030$ ,  
557 Cohen's  $d = 0.72$ ,  $BF = 4.94$ ]. The prediction accuracy was not significantly different between  
558 the dual-task conditions [ $t(15) = -.79$ ,  $p = .44$ , Cohen's  $d = 0.20$ ,  $BF = 0.34$ ].

559         Considering the modulation by task condition, we further examined whether divided  
560 attention eliminated neural tracking of onset spectrogram. The prediction accuracy at individual  
561 task conditions was significantly above zero (all uncorrected  $ps < .001$ , Cohen's  $d > 1.20$ ,  $BF >$   
562  $256.40$ ; Figure 5D), suggesting that directing attention from one task to two tasks did not  
563 eliminate the neural tracking of acoustic onsets.

564         Finally, we examined the effect of task condition on the mTRFs for the onset  
565 spectrogram (Figure 5F). mTRFs to a continuous stimulus like the auditory spectrogram can be  
566 conceived of as evoked responses to an elementary event in the stimulus (i.e., the impulse  
567 response). The mTRF amplitudes in the auditory single-task condition were larger compared to  
568 the high load dual-task condition from 200 to 260 ms ( $p = .003$ ). Further, a visual inspection of  
569 the mTRFs from individual subjects revealed two relatively reliable peaks at about 56 (P1) and  
570 152 (P2) ms. Latencies of these peaks were not significantly different across conditions [56 ms:  
571  $F(2,30) = .65$ , uncorrected  $p = .94$ ,  $\eta^2_p = 0.004$ ; 152 ms:  $F(2,30) = .62$ , uncorrected  $p = .54$ ,  $\eta^2_p =$   
572  $0.04$ ].

573         In sum, acoustic tracking was very similar across conditions, with only a slight reduction  
574 in the tracking of acoustic onsets in the divided attention tasks, compared to the single task. This  
575 difference was likely explained by a reduction in a relatively late response component, starting at  
576 200 ms.

577 **Divided attention, but not visual load, reduces late tracking of**  
578 **linguistic information**

579 The linguistic predictors significantly contributed to model prediction beyond the visual and  
580 acoustic predictors ( $t_{\max} = 4.95$ ,  $p < .001$ ; Figure 6A). The cluster-based test indicated that the  
581 effect of linguistic predictors was primarily observed for temporal-central electrodes. These  
582 results provide evidence for neural tracking of linguistic properties of speech.

583

584 **[Fig 6 about here]**

585

586 **Figure 6. Neural tracking of linguistic information across task conditions.** (A) Increase in  
587 prediction accuracy ( $\Delta z$ ) due to linguistic predictors of speech (word onsets, phoneme onsets,  
588 sublexical surprisal and entropy, word-form surprisal and entropy, and sentence surprisal and  
589 entropy), which was significantly above zero across highlighted (yellow) electrodes in the  
590 topography. Blue dots denote individual participants. (B) Prediction accuracy for combined  
591 linguistic predictors across conditions. Blue lines denote individual participants: Thicker lines  
592 indicate lower accuracy for high vs. low load condition, and thinner lines indicate higher  
593 accuracy for high vs. low load condition. Red asterisks denote  $p$  values for comparison between  
594 conditions. (C) Prediction accuracy for three context levels (sublexical, word-form, and  
595 sentence) across conditions. Each level includes entropy and surprisal predictors. (D) Global  
596 field power (GFP; top) of mTRFs and related topographies (bottom) for each context level. The  
597 mTRF GFPs were averaged across entropy and surprisal. (E) Prediction accuracy for entropy and  
598 surprisal. Each predictor includes the three context levels. (F) GFP of mTRFs and related  
599 topographies for entropy and surprisal. (B), (C), and (E) Error bars denote 95% confidence  
600 interval. (D) and (F) Shaded areas denote standard errors around the mean. Horizontal lines

601 denote time windows in which the mTRFs were significantly different between task conditions.  
602 Topographies are shown for selected times indicated in GFPs (grey vertical lines). A-ST:  
603 auditory single-task, Lo-DT: low load dual-task, Hi-DT: high load dual-task. \*  $p < .05$ , \*\*\*  $p <$   
604  $.001$ .

605

606

607

608 The prediction accuracy for linguistic predictors was modulated by task condition  
609 [ $F(1.41, 21.15) = 6.66$ ,  $p = .029$ ,  $\eta^2_p = 0.31$ ,  $BF = 10.82$ ; Figure 6B]. The prediction accuracy  
610 significantly dropped in the two dual-task conditions compared to the auditory single-task  
611 condition [vs. low load dual-task,  $t(15) = 2.83$ ,  $p = .029$ , Cohen's  $d = 0.71$ ,  $BF = 4.49$ ; vs. high  
612 load dual-task,  $t(15) = 2.61$ ,  $p = .029$ , Cohen's  $d = 0.65$ ,  $BF = 3.16$ ]. The prediction accuracy was  
613 not significantly different between the two dual-task conditions [ $t(15) = -1.80$ ,  $p = .091$ , Cohen's  
614  $d = 0.45$ ,  $BF = 0.95$ ]. These results suggest that neural tracking of linguistic information was  
615 reduced when directing attention from one task to two tasks.

616 Next, we conducted three sets of analyses to assess whether the effect of task condition  
617 could be attributed to specific linguistic properties.

## 618 **Task effects appear to be similar across different context levels**

619 The first analysis focused on the three context levels (sublexical, word-form, and sentence). Each  
620 level independently contributed significantly to model prediction (sublexical:  $t_{\max} = 5.22$ ,  $p <$   
621  $.001$ ; word-form:  $t_{\max} = 3.92$ ,  $p < .001$ ; sentence:  $t_{\max} = 4.98$ ,  $p < .001$ ; Figure 6C). A two-way  
622 repeated-measures ANOVA showed that the interaction between context level and task condition  
623 was not significant [ $F(2.55, 38.18) = 1.19$ ,  $p = .40$ ,  $\eta^2_p = 0.073$ ,  $BF = 0.19$ ]. The main effect of

624 context level was not significant [ $F(2,30) = .32, p = .77, \eta^2_p = 0.021, BF = 0.08$ ]. But the main  
625 effect of task condition was significant [ $F(1.2,18.01) = 8.46, p = .021, \eta^2_p = 0.36, BF = 1.40 \times$   
626  $10^3$ ]. Post hoc analysis showed that the prediction accuracy was significantly reduced from the  
627 auditory single-task condition to the low load [ $t(15) = 2.90, p = .016, \text{Cohen's } d = 0.73, BF =$   
628  $5.08$ ] and high load dual-task conditions [ $t(15) = 4.27, p = .002, \text{Cohen's } d = 1.07, BF = 54.63$ ].  
629 But the prediction accuracy was not significantly different between the low and high load dual-  
630 task condition [ $t(15) = 1.02, p = .32, \text{Cohen's } d = 0.26, BF = 0.40$ ]. Further, we found similar  
631 patterns of results when restricting the two-way repeated-measures ANOVA analysis to the dual-  
632 task conditions. In sum, patterns of task condition effects observed for linguistic predictors  
633 appeared to be similar across the different linguistic models.

634         Considering the modulation by context level and task condition, we further examined  
635 whether divided attention eliminated neural tracking of any of these predictors. The prediction  
636 accuracies for all predictors at individual task conditions were significantly above zero (all  
637 uncorrected  $ps < .03, \text{Cohen's } d > 0.53, BF > 1.51$ ).

638         Regarding mTRFs, the effect of task condition was not significant for sublexical or word-  
639 form context but was for sentence context (Figure 6D). The mTRF amplitude of sentence context  
640 in the auditory single-task condition was larger compared to the low load dual-task condition  
641 from 400 to 430 ms ( $p = .036$ ). Topographies suggest that this is due to a broadly distributed  
642 more negative component in the single task condition.

643         Initial response peaks to linguistic features appear relatively early. This is consistent with  
644 previous results (Brodbeck et al., 2022) and might be partly because forced alignment, which  
645 was used to determine phoneme timing, does not take into account coarticulation effects. Some

646 information about upcoming phonetic features might thus have systematically precede the  
647 estimates of phoneme onset times we used.

## 648 **Neural tracking of surprisal might increase with visual load**

649 The second analysis focused on entropy and surprisal. The two predictors independently  
650 contributed significantly to model prediction (entropy:  $t_{\max} = 5.51$ ,  $p < .001$ ; surprisal:  $t_{\max} =$   
651  $3.91$ ,  $p = .001$ ; Figure 6E). A two-way repeated-measures ANOVA showed that the interaction  
652 between predictor type (entropy vs. surprisal) and task condition was not significant [ $F(1,32,$   
653  $19.86) = 1.29$ ,  $p = .40$ ,  $\eta^2_p = 0.079$ ,  $BF = 0.31$ ]. The main effect of predictor type was not  
654 significant [ $F(1,15) = .31$ ,  $p = .65$ ,  $\eta^2_p = 0.02$ ,  $BF = 0.23$ ]. But the main effect of task condition  
655 was significant [ $F(1,35,20.2) = 9.85$ ,  $p = .011$ ,  $\eta^2_p = 0.40$ ,  $BF = 890.10$ ]. Post hoc analysis  
656 showed that, when averaging across surprisal and entropy, the prediction accuracy was  
657 significantly reduced from the auditory single-task condition to the low load [ $t(15) = 3.28$ ,  $p =$   
658  $.008$ , Cohen's  $d = 0.82$ ,  $BF = 9.56$ ] and high load dual-task conditions [ $t(15) = 4.11$ ,  $p = .003$ ,  
659 Cohen's  $d = 1.03$ ,  $BF = 40.91$ ]. Numerically, the prediction accuracy was improved from the low  
660 load to high load dual-task condition, but this difference was not significant [ $t(15) = 1.27$ ,  $p =$   
661  $.22$ , Cohen's  $d = 0.32$ ,  $BF = 0.51$ ].

662 Because of theoretical predictions of enhanced reliance on linguistic representations  
663 during higher visual task load (see *Introduction* and *Discussion*), we further restricted the two-  
664 way repeated-measures ANOVA analysis to the dual-task conditions. The interaction between  
665 predictor type and task condition was significant [ $F(1,15) = 5.75$ , uncorrected  $p = .03$  (FDR-  
666 corrected  $p = .063$ ),  $\eta^2_p = 0.28$ ,  $BF = 1.23$ ]. There was no significant main effect of predictor type  
667 [ $F(1,15) = 1.92$ ,  $p = .33$ ,  $\eta^2_p = 0.11$ ,  $BF = 0.40$ ] or task condition [ $F(1,15) = 1.62$ ,  $p = .36$ ,  $\eta^2_p =$   
668  $0.097$ ,  $BF = 0.79$ ]. Post hoc analysis showed that for entropy, the prediction accuracy was not

669 different between the dual-task conditions [ $t(15) = .10, p = .92, \text{Cohen's } d = 0.03, \text{BF} = 0.26$ ].  
670 But for surprisal, the prediction accuracy was significantly improved from the low load to high  
671 load dual-task condition [ $t(15) = 2.20, \text{uncorrected } p = .044, \text{Cohen's } d = 0.55, \text{BH} = 1.66$ ].

672         Considering the modulation by predictor type and task condition, we further examined  
673 whether divided attention eliminated neural tracking of entropy or surprisal. The prediction  
674 accuracies for both predictors at individual task conditions were significantly above zero (all  
675 uncorrected  $p$ s  $< .01, \text{Cohen's } d > 0.66, \text{BF} > 3.36$ ), except for the surprisal predictors at the low  
676 load dual-task condition (uncorrected  $p = .059, \text{Cohen's } d = 0.41, \text{BF} = 0.78$ ).

677         Regarding mTRFs, the mTRF amplitude of entropy in the low load dual-task condition  
678 was smaller than the high load dual-task condition from 160 to 200 ms (uncorrected  $p = .037$ ).  
679 The mTRF amplitude of surprisal in the low load dual-task condition was smaller compared to  
680 the auditory single-task condition from 380 to 430 ms (uncorrected  $p = .012$ ). We did not  
681 observe a significant effect of task load, although the mTRF to surprisal during high visual load  
682 was numerically stronger than low load from 200 ms onwards.

### 683 **Divided attention or visual load does not affect neural tracking of word onsets**

684 The third set of analysis focused on word onset. This predictor independently contributed  
685 significantly to model prediction ( $t_{\text{max}} = 4.51, p < .001$ ; Figure 7A). But the effect of task  
686 condition on prediction accuracy was not significant [ $F(2,30) = .07, p = .93, \eta^2_p = 0.005, \text{BF} =$   
687  $0.17$ ; Figure 7B].

688

689 **[Fig 7 about here]**

690

691 **Figure 7. Neural tracking of word onsets across task conditions.** (A) Topography showing  
692 the increase in prediction accuracy ( $\Delta z$ ) due to word onsets, which was significantly above zero  
693 across highlighted (yellow) electrodes. (B) Prediction accuracy across conditions. Blue lines  
694 denote individual participants: Thicker lines indicate higher accuracy for the high vs. low load  
695 condition, and thinner lines indicate lower accuracy for the high vs low load condition. Error  
696 bars denote 95% within-subject confidence interval (Loftus & Masson, 1994). (C) Global field  
697 power (GFP) of mTRFs. Shaded areas denote within-subject standard error around the mean. (D)  
698 Topographies of selected times in panel C (grey vertical lines). \*  $p < .05$ , \*\*  $p < .01$ .

699

700 Taken together, results suggest that directing attention from one task to two tasks may  
701 reduce but does not eliminate the neural tracking of linguistic features of speech. However,  
702 increasing visual load does not lead to a further reduction. On the contrary, an increasing load of  
703 the dual task might even be associated with enhanced neural tracking of phoneme surprisal.  
704 However, this effect should be interpreted with care because the effect was not significant when  
705 analyzing all linguistic predictors as a group or after correction for multiple comparisons.

## 706 Discussion

707 We examined the extent to which bimodal divided attention influences acoustic and linguistic  
708 representations of natural continuous speech. Compared to unimodal auditory speech processing,  
709 the visual tasks affected acoustic onsets (but not the acoustic spectrogram, Figure 5D) and  
710 linguistic representations related to predictive processing (but not to lexical segmentation, Figure  
711 6E). Surprisingly, we did not find evidence of further reduction (at any processing level) with  
712 increased visual (dual) task load, despite unambiguous behavioral and neural evidence of the  
713 high load task as being more demanding (Figures 3 and 4).



714 **Locus of effects of bimodal divided attention on continuous speech**  
715 **processing**

716 We noted a striking dissociation between the impact of the dual-task on behavioral performance  
717 in the speech comprehension task, and a relative lack of impact on neural speech processing.  
718 Behaviorally, the dual-task load clearly impacted listeners' ability to answer auditory  
719 comprehension questions. However, neural tracking of acoustic and linguistic speech features  
720 was affected only at late response components, and remained largely unchanged with varying  
721 dual-task load. This neural and behavioral dissociation suggests that bimodal divided attention  
722 largely only impacts late, post-perceptual processes of continuous speech processing. The  
723 significant and unchanged responses related to predictive processing using the sentence context  
724 suggest that listeners could track multi-word sequences regardless of dual-task load. We posit  
725 that the decreased behavioral performance originates from higher-order cognitive processes that  
726 are not adequately described by probabilistic word-sequence models, such as semantic  
727 integration and memory formation.

728       Previous behavioral research has suggested that increased dual-task load is associated  
729 with reduced acoustic sensitivity during speech recognition (Mattys et al., 2014; Mattys &  
730 Palmer, 2015; Mattys & Wiget, 2011). In our data, the dual-task did not alter early acoustic  
731 responses and only had subtle effects on later (> 200 ms) responses (see Figures 5E and 5F). This  
732 suggests that the effect of bimodal divided attention may not be on basic acoustic representations  
733 per se, but on secondary acoustic analysis stages or on how these representations are accessed  
734 and used by higher-order processes.

## 735 **Implications for resource-based accounts**

736 A common framework for understanding effects under dual-task paradigms is resource-based  
737 (Wahn & König, 2017). When two tasks draw from a limited pool of shared resources, increased  
738 load in one task is associated with poorer performance in another task. Such a hypothesis is often  
739 referred to as the *supramodal* account of crossmodal attention (Broadbent, 1958; Ciaramitaro et  
740 al., 2017; Klemen et al., 2009; Macdonald & Lavie, 2011; Molloy et al., 2015). In contrast, if the  
741 increased load in one task does not affect a corresponding decrease in another, the two modalities  
742 can draw on separate resource pools. Such a hypothesis is consistent with a *modality-specific*  
743 account of crossmodal attention (Alais et al., 2006; Arrighi et al., 2011; Duncan et al., 1997;  
744 Keitel et al., 2013; Parks et al., 2011; Porcu et al., 2014).

745 Here, we observed a reduction in neural tracking of speech acoustic and linguistic  
746 features under bimodal divided attention, consistent with previous studies demonstrating  
747 detrimental effects of bimodal divided attention for simplified speech stimuli such as syllables  
748 (Gennari et al., 2018), words (Kasper et al., 2014), and sentences (Salo et al., 2015). In  
749 conjunction with the co-occurring improved neural tracking of visual stimuli, this finding  
750 appears to suggest a tradeoff between attending to the auditory versus visual modalities. Hence,  
751 these results appear to align with the *supramodal* hypothesis of the dual-task effects that the  
752 auditory and visual tasks of our study draw on a limited pool of shared resources (Broadbent,  
753 1958; Ciaramitaro et al., 2017; Klemen et al., 2009; Macdonald & Lavie, 2011; Molloy et al.,  
754 2015).

755 However, a *supramodal* hypothesis of the dual-task effects does not seem to fit other key  
756 results from our study. First, the impact of bimodal divided attention is specific to certain  
757 features of the speech signals: we found bimodal attention effects for acoustic onsets but not  
758 acoustic envelope representations, and for predictive linguistic processing, indexed through

759 information-theoretic variables, but not lexical segmentation, indexed through the word-onset  
760 predictors. In each case, the impact of divided attention is not a generally reduced representation  
761 but is restricted to only specific response components in the response time courses (the mTRFs).

762 Furthermore, a resource-based account would suggest that when the visual load is further  
763 increased, available resources for speech representations should further decrease, which is not  
764 what we observed. Instead, adding a visual task exacted a cost on neural speech representations,  
765 but this cost did not scale with the task load. In contrast to these neural effects, task load did  
766 affect behavioral performance on the auditory task. These divergent results may require an  
767 explanation involving different resource pools (Wahn & König, 2017). For example, there may  
768 be a resource pool for sensory processing, which is sensitive to divided attention but not task  
769 load, thus, is relatively modality-specific. There may be a second resource pool, which is  
770 sensitive to task load and affects higher-order story comprehension, thus, is relatively  
771 supramodal.

## 772 **Selective *versus* divided attention on speech processing**

773 Previous studies on continuous speech processing have shown that selective attention within and  
774 between modalities strongly modulates neural processing of both acoustic and linguistic features  
775 of continuous speech, and the attentional effects seem to be even stronger for linguistic  
776 processing (Brodbeck et al., 2018; Broderick et al., 2018; Ding et al., 2018; Kiremitçi et al.,  
777 2021; Vanthornhout et al., 2019; Yahav & Golumbic, 2021). Specifically, neural tracking of  
778 acoustic features is reduced and delayed but not eliminated for unattended speech, but the  
779 tracking of linguistic features is virtually abolished. A parsimonious null hypothesis, consistent  
780 with the notion of a shared resource pool, is that speech representations during divided attention

781 ought to be halfway between attended and ignored speech. Our results suggest that this is not the  
782 case.

783 First, certain speech features (e.g., acoustic spectrogram and word onsets) that have been  
784 shown in prior work to be modulated by selective attention are insensitive to bimodal divided  
785 attention. Second, unlike prior work demonstrating differential selective attention effects on the  
786 relative balance of acoustic vs. linguistic processing, we did not observe a greater reduction in  
787 linguistic processing than acoustic processing with the manipulation of divided attention. The  
788 neural tracking of both feature classes is reduced but not eliminated. Third, for those features  
789 showing modulation by divided attention, we did not observe any delay in the neural responses  
790 as reflected in the mTRFs (Figures 5 and 6). Fourth, the effect of divided attention emerged  
791 largely at later stages (after ~200 ms) with the earlier latencies relatively unaffected. Thus, the  
792 effect of bimodal divided attention on neural continuous speech processing appears to be feature-  
793 specific and occurs relatively late in processing.

794 These differences indicate that selective and divided attention are subserved by distinct  
795 mechanisms. Relative to selective attention, bimodal divided attention tasks may be associated  
796 with additional recruitment of frontal regions that interact with sensory cortices (Gennari et al.,  
797 2018; Johnson & Zatorre, 2006; Loose et al., 2003). A stronger engagement of frontal regions  
798 has been associated with poorer task performance (Gennari et al., 2018; Johnson & Zatorre,  
799 2006). These neural findings appear to align with the argument that the costs of bimodal divided  
800 attention may come from limitations of executive control to coordinate processes related to two  
801 tasks rather than a competition for shared sensory resources (Katus & Eimer, 2019; Loose et al.,  
802 2003). The differential effects of selective and divided attention on continuous speech processing  
803 suggest that the costs of selective attention are more likely to originate from ‘filter’ mechanisms

804 (Broadbent, 1958; Lachter et al., 2004) that pass task-relevant signals but block task-irrelevant  
805 others, instead of the re-allocation of shared resources. Nevertheless, future studies are needed to  
806 elucidate mechanisms underlying differences in continuous speech processing between selective  
807 and divided attention.

### 808 **Increased responses to surprisal with dual-task load**

809 We found that increasing visual load increased responses to phoneme surprisal, but not entropy.  
810 This effect was statistically only seen after excluding the auditory single-task condition and  
811 should thus be interpreted with care, but it is consistent with several extant findings. The  
812 dissociation between entropy and surprisal is consistent with recent evidence that these two  
813 processes may reflect different neural processes (Gaston et al., 2022). Neural responses  
814 associated with surprisal may reflect prediction errors that signal the difference between  
815 predicted and observed phonemes. Such prediction error signals may be boosted when attention  
816 is directed to the speech stimuli (e.g., auditory single-task; Auztulewicz & Friston, 2015;  
817 Smout et al., 2019) or when attention to the speech stimuli is directed away to demanding  
818 crossmodal tasks (e.g., high-load visual tasks; Xie et al., 2018). The increased response to  
819 surprisal might also reflect a shift toward more reliance on linguistic representations during  
820 speech processing when resources for auditory processing were constrained under divided  
821 attention of higher load (Mattys et al., 2009; Mattys & Wiget, 2011).

### 822 **Neural tracking of word onsets was not affected by divided attention**

823 Tracking of word onsets might reflect lexical segmentation (Sanders et al., 2002; Sanders &  
824 Neville, 2003) and, along with other linguistic features, is strongly affected by selective attention  
825 (Brodbeck et al., 2018). It has been suggested that neural responses to word onsets reflect the

826 dynamic allocation of attention to time windows that contain word onsets (Astheimer & Sanders,  
827 2009). However, our results indicate that tracking of word onsets is robust to manipulations of  
828 attentional load by adding a visual task and increasing dual-task load. This suggests that the  
829 word-onset attention effect may draw on a relatively unshared resource pool, or that the word-  
830 onset responses reflect a more mechanistic aspect of lexical segmentation.

## 831 **Conclusion**

832 This study demonstrates a striking dissociation between the impact of dual-task load on  
833 behavioral speech comprehension performance and a relative lack of impact on time-locked  
834 neural representations of continuous speech. The behavioral effects of bimodal divided attention  
835 on continuous speech processing occur not due to impaired early sensory representations but  
836 likely at later cognitive processing stages.

837

## 838 **References**

- 839 Alais, D., Morrone, C., & Burr, D. (2006). Separate attentional resources for vision and audition.  
840 *Proceedings of the Royal Society B: Biological Sciences*, 273(1592), 1339–1345.
- 841 Arrighi, R., Lunardi, R., & Burr, D. (2011). Vision and audition do not share attentional  
842 resources in sustained tasks. *Frontiers in Psychology*, 2, 56.
- 843 Astheimer, L. B., & Sanders, L. D. (2009). Listeners modulate temporally selective attention  
844 during natural speech processing. *Biological Psychology*, 80(1), 23–34.
- 845 Auksztulewicz, R., & Friston, K. (2015). Attentional enhancement of auditory mismatch  
846 responses: A DCM/MEG study. *Cerebral Cortex*, 25(11), 4273–4283.

- 847 Benjamini, Y., & Hochberg, Y. (1995). Controlling the false discovery rate: A practical and  
848 powerful approach to multiple testing. *Journal of the Royal Statistical Society: Series B*  
849 *(Methodological)*, 57(1), 289–300.
- 850 Bidelman, G. M., & Alain, C. (2015). Musical training orchestrates coordinated neuroplasticity  
851 in auditory brainstem and cortex to counteract age-related declines in categorical vowel  
852 perception. *Journal of Neuroscience*, 35(3), 1240–1249.
- 853 Broadbent, D. E. (1958). *Perception and communication*. Pergamon Press.
- 854 Brodbeck, C., Bhattasali, S., Heredia, A. A. C., Resnik, P., Simon, J. Z., & Lau, E. (2022).  
855 Parallel processing in speech perception with local and global representations of  
856 linguistic context. *Elife*, 11, e72056.
- 857 Brodbeck, C., Das, P., Kulasingham, J. P., Bhattasali, S., Gaston, P., Resnik, P., & Simon, J. Z.  
858 (2021). Eelbrain: A Python toolkit for time-continuous analysis with temporal response  
859 functions. *BioRxiv*.
- 860 Brodbeck, C., Hong, L. E., & Simon, J. Z. (2018). Rapid transformation from auditory to  
861 linguistic representations of continuous speech. *Current Biology*, 28(24), 3976–3983.
- 862 Brodbeck, C., Jiao, A., Hong, L. E., & Simon, J. Z. (2020). Neural speech restoration at the  
863 cocktail party: Auditory cortex recovers masked speech of both attended and ignored  
864 speakers. *PLoS Biology*, 18(10), e3000883.
- 865 Brodbeck, C., & Simon, J. Z. (2020). Continuous speech processing. *Current Opinion in*  
866 *Physiology*, 18, 25–31.
- 867 Broderick, M. P., Anderson, A. J., Di Liberto, G. M., Crosse, M. J., & Lalor, E. C. (2018).  
868 Electrophysiological correlates of semantic dissimilarity reflect the comprehension of  
869 natural, narrative speech. *Current Biology*, 28(5), 803–809.

- 870 Ciaramitaro, V. M., Chow, H. M., & Eglington, L. G. (2017). Cross-modal attention influences  
871 auditory contrast sensitivity: Decreasing visual load improves auditory thresholds for  
872 amplitude-and frequency-modulated sounds. *Journal of Vision*, *17*(3), 20–20.
- 873 Crosse, M. J., Di Liberto, G. M., Bednar, A., & Lalor, E. C. (2016). The multivariate temporal  
874 response function (mTRF) toolbox: A MATLAB toolbox for relating neural signals to  
875 continuous stimuli. *Frontiers in Human Neuroscience*, *10*, 604.
- 876 Ding, N., Pan, X., Luo, C., Su, N., Zhang, W., & Zhang, J. (2018). Attention is required for  
877 knowledge-based sequential grouping: Insights from the integration of syllables into  
878 words. *Journal of Neuroscience*, *38*(5), 1178–1188.
- 879 Ding, N., & Simon, J. Z. (2012). Neural coding of continuous speech in auditory cortex during  
880 monaural and dichotic listening. *Journal of Neurophysiology*, *107*(1), 78–89.
- 881 Duncan, J., Martens, S., & Ward, R. (1997). Restricted attentional capacity within but not  
882 between sensory modalities. *Nature*, *387*(6635), 808–810.
- 883 Fishbach, A., Nelken, I., & Yeshurun, Y. (2001). Auditory edge detection: A neural model for  
884 physiological and psychoacoustical responses to amplitude transients. *Journal of*  
885 *Neurophysiology*, *85*(6), 2303–2323.
- 886 Gaston, P., Brodbeck, C., Phillips, C., & Lau, E. (2022). Auditory Word Comprehension is Less  
887 Incremental in Isolated Words. *Neurobiology of Language*, 1–50.  
888 [https://doi.org/10.1162/nol\\_a\\_00084](https://doi.org/10.1162/nol_a_00084)
- 889 Gennari, S. P., Millman, R. E., Hymers, M., & Mattys, S. L. (2018). Anterior paracingulate and  
890 cingulate cortex mediates the effects of cognitive load on speech sound discrimination.  
891 *NeuroImage*, *178*, 735–743.



- 892 Gillis, M., Van Canneyt, J., Francart, T., & Vanthornhout, J. (2022). Neural tracking as a  
893 diagnostic tool to assess the auditory pathway. *Hearing Research*, 108607.
- 894 Gramfort, A., Luessi, M., Larson, E., Engemann, D. A., Strohmeier, D., Brodbeck, C., Goj, R.,  
895 Jas, M., Brooks, T., & Parkkonen, L. (2013). MEG and EEG data analysis with MNE-  
896 Python. *Frontiers in Neuroscience*, 267.
- 897 Hamilton, L. S., & Huth, A. G. (2020). The revolution will not be controlled: Natural stimuli in  
898 speech neuroscience. *Language, Cognition and Neuroscience*, 35(5), 573–582.
- 899 Heafield, K. (2011). *KenLM: Faster and smaller language model queries*. 187–197.
- 900 Hickok, G., & Poeppel, D. (2007). The cortical organization of speech processing. *Nature*  
901 *Reviews Neuroscience*, 8(5), 393–402.
- 902 Jaeggi, S. M., Buschkuhl, M., Etienne, A., Ozdoba, C., Perrig, W. J., & Nirkko, A. C. (2007).  
903 On how high performers keep cool brains in situations of cognitive overload. *Cognitive,*  
904 *Affective, & Behavioral Neuroscience*, 7(2), 75–89.
- 905 Johnson, J. A., & Zatorre, R. J. (2006). Neural substrates for dividing and focusing attention  
906 between simultaneous auditory and visual events. *Neuroimage*, 31(4), 1673–1681.
- 907 Kasper, R. W., Cecotti, H., Touryan, J., Eckstein, M. P., & Giesbrecht, B. (2014). Isolating the  
908 neural mechanisms of interference during continuous multisensory dual-task  
909 performance. *Journal of Cognitive Neuroscience*, 26(3), 476–489.
- 910 Katus, T., & Eimer, M. (2019). The sources of dual-task costs in multisensory working memory  
911 tasks. *Journal of Cognitive Neuroscience*, 31(2), 175–185.
- 912 Keitel, C., Maess, B., Schröger, E., & Müller, M. M. (2013). Early visual and auditory  
913 processing rely on modality-specific attentional resources. *Neuroimage*, 70, 240–249.

- 914 Keuleers, E., Brysbaert, M., & New, B. (2010). SUBTLEX-NL: A new measure for Dutch word  
915 frequency based on film subtitles. *Behavior Research Methods*, *42*(3), 643–650.
- 916 Kiremitçi, I., Yilmaz, Ö., Çelik, E., Shahdloo, M., Huth, A. G., & Çukur, T. (2021). Attentional  
917 modulation of hierarchical speech representations in a multitalker environment. *Cerebral*  
918 *Cortex*, *31*(11), 4986–5005.
- 919 Klemen, J., Büchel, C., & Rose, M. (2009). Perceptual load interacts with stimulus processing  
920 across sensory modalities. *European Journal of Neuroscience*, *29*(12), 2426–2434.
- 921 Lachter, J., Forster, K. I., & Ruthruff, E. (2004). Forty-five years after Broadbent (1958): Still no  
922 identification without attention. *Psychological Review*, *111*(4), 880.
- 923 Loftus, G. R., & Masson, M. E. (1994). Using confidence intervals in within-subject designs.  
924 *Psychonomic Bulletin & Review*, *1*(4), 476–490.
- 925 Loose, R., Kaufmann, C., Auer, D. P., & Lange, K. W. (2003). Human prefrontal and sensory  
926 cortical activity during divided attention tasks. *Human Brain Mapping*, *18*(4), 249–259.
- 927 Macdonald, J. S., & Lavie, N. (2011). Visual perceptual load induces inattentive deafness.  
928 *Attention, Perception, & Psychophysics*, *73*(6), 1780–1789.
- 929 Maris, E., & Oostenveld, R. (2007). Nonparametric statistical testing of EEG-and MEG-data.  
930 *Journal of Neuroscience Methods*, *164*(1), 177–190.
- 931 Marslen-Wilson, W. D. (1987). Functional parallelism in spoken word-recognition. *Cognition*,  
932 *25*(1–2), 71–102.
- 933 Mattys, S. L., Barden, K., & Samuel, A. G. (2014). Extrinsic cognitive load impairs low-level  
934 speech perception. *Psychonomic Bulletin & Review*, *21*(3), 748–754.
- 935 Mattys, S. L., Brooks, J., & Cooke, M. (2009). Recognizing speech under a processing load:  
936 Dissociating energetic from informational factors. *Cognitive Psychology*, *59*(3), 203–243.

- 937 Mattys, S. L., & Palmer, S. D. (2015). Divided attention disrupts perceptual encoding during  
938 speech recognition. *The Journal of the Acoustical Society of America*, *137*(3), 1464–  
939 1472.
- 940 Mattys, S. L., & Wiget, L. (2011). Effects of cognitive load on speech recognition. *Journal of*  
941 *Memory and Language*, *65*(2), 145–160.
- 942 McAuliffe, M., Socolof, M., Mihuc, S., Wagner, M., & Sonderegger, M. (2017). *Montreal*  
943 *Forced Aligner: Trainable Text-Speech Alignment Using Kaldi*. 2017, 498–502.
- 944 Molloy, K., Griffiths, T. D., Chait, M., & Lavie, N. (2015). Inattentional deafness: Visual load  
945 leads to time-specific suppression of auditory evoked responses. *Journal of*  
946 *Neuroscience*, *35*(49), 16046–16054.
- 947 Morey, R. D., Rouder, J. N., Jamil, T., & Morey, M. R. D. (2022). *BayesFactor: Computation of*  
948 *Bayes Factors for Common Designs*. <https://CRAN.R-project.org/package=BayesFactor>
- 949 Oostenveld, R., & Praamstra, P. (2001). The five percent electrode system for high-resolution  
950 EEG and ERP measurements. *Clinical Neurophysiology*, *112*(4), 713–719.
- 951 Parks, N. A., Hilimire, M. R., & Corballis, P. M. (2011). Steady-state signatures of visual  
952 perceptual load, multimodal distractor filtering, and neural competition. *Journal of*  
953 *Cognitive Neuroscience*, *23*(5), 1113–1124.
- 954 Pickering, M. J., & Gambi, C. (2018). Predicting while comprehending language: A theory and  
955 review. *Psychological Bulletin*, *144*(10), 1002.
- 956 Porcu, E., Keitel, C., & Müller, M. M. (2014). Visual, auditory and tactile stimuli compete for  
957 early sensory processing capacities within but not between senses. *Neuroimage*, *97*, 224–  
958 235.

- 959 Salo, E., Rinne, T., Salonen, O., & Alho, K. (2015). Brain activations during bimodal dual tasks  
960 depend on the nature and combination of component tasks. *Frontiers in Human*  
961 *Neuroscience*, 9, 102.
- 962 Sanders, L. D., & Neville, H. J. (2003). An ERP study of continuous speech processing: I.  
963 Segmentation, semantics, and syntax in native speakers. *Cognitive Brain Research*, 15(3),  
964 228–240.
- 965 Sanders, L. D., Newport, E. L., & Neville, H. J. (2002). Segmenting nonsense: An event-related  
966 potential index of perceived onsets in continuous speech. *Nature Neuroscience*, 5(7),  
967 700–703.
- 968 Schneider, W., Eschman, A., & Zuccolotto, A. (2002). *E-Prime: User's guide. Reference guide.*  
969 *Getting started guide*. Psychology Software Tools, Incorporated.
- 970 Smout, C. A., Tang, M. F., Garrido, M. I., & Mattingley, J. B. (2019). Attention promotes the  
971 neural encoding of prediction errors. *PLoS Biology*, 17(2), e2006812.
- 972 Snodgrass, J. G., & Corwin, J. (1988). Pragmatics of measuring recognition memory:  
973 Applications to dementia and amnesia. *Journal of Experimental Psychology: General*,  
974 117(1), 34.
- 975 Team, R. C. (2022). *R: A language and environment for statistical computing*. [https://www.R-](https://www.R-project.org/)  
976 [project.org/](https://www.R-project.org/).
- 977 Vanthornhout, J., Decruy, L., & Francart, T. (2019). Effect of task and attention on neural  
978 tracking of speech. *Frontiers in Neuroscience*, 13, 977.
- 979 Wahn, B., & König, P. (2017). Is attentional resource allocation across sensory modalities task-  
980 dependent? *Advances in Cognitive Psychology*.

- 981 Xie, Z., Reetzke, R., & Chandrasekaran, B. (2018). Taking attention away from the auditory  
982 modality: Context-dependent effects on early sensory encoding of speech. *Neuroscience*,  
983 *384*, 64–75.
- 984 Yahav, P. H., & Golumbic, E. Z. (2021). Linguistic processing of task-irrelevant speech at a  
985 cocktail party. *Elife*, *10*, e65096.
- 986

**A) High Load Dual-Task (3-back visual task)**

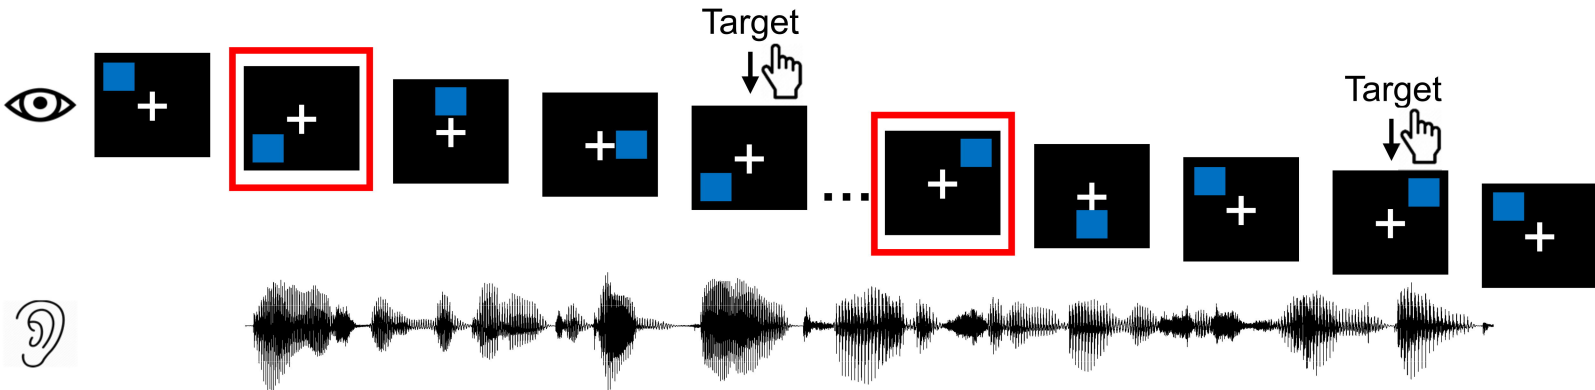

**B) Low Load Dual-Task (0-back visual task)**

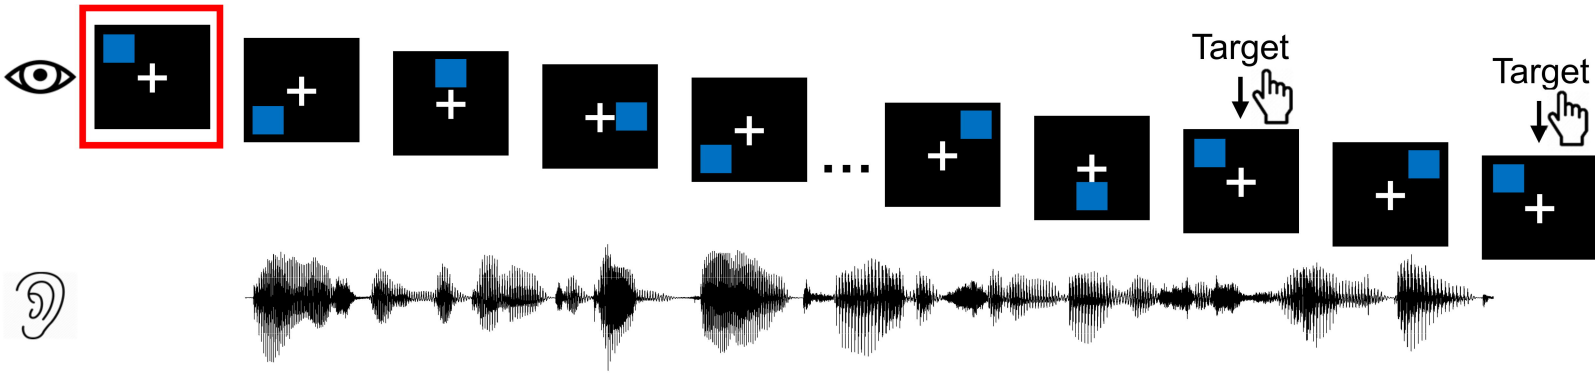

**C) Auditory single-task**

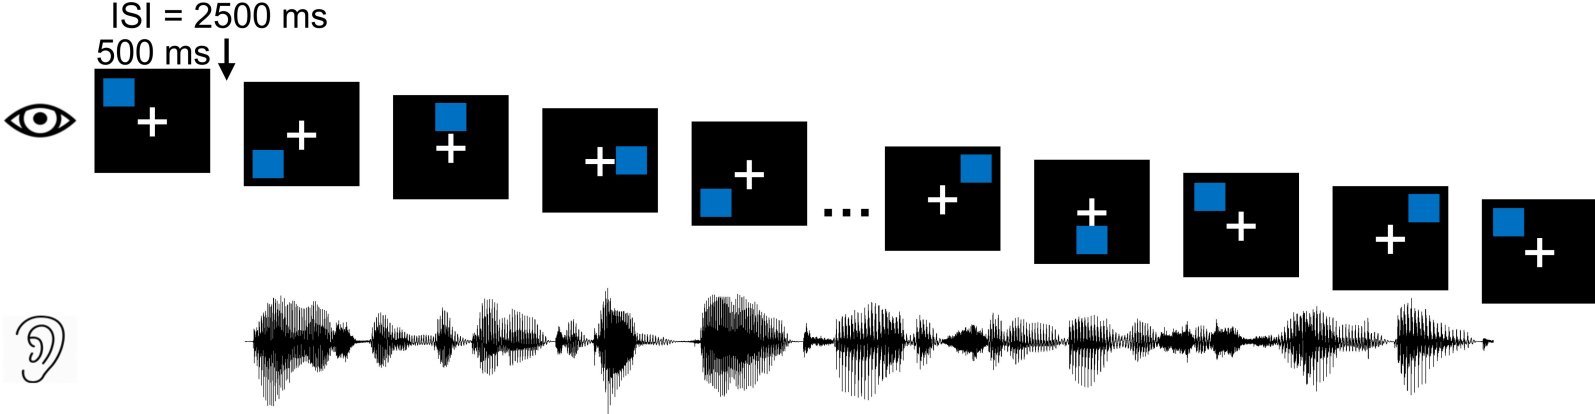

69 s

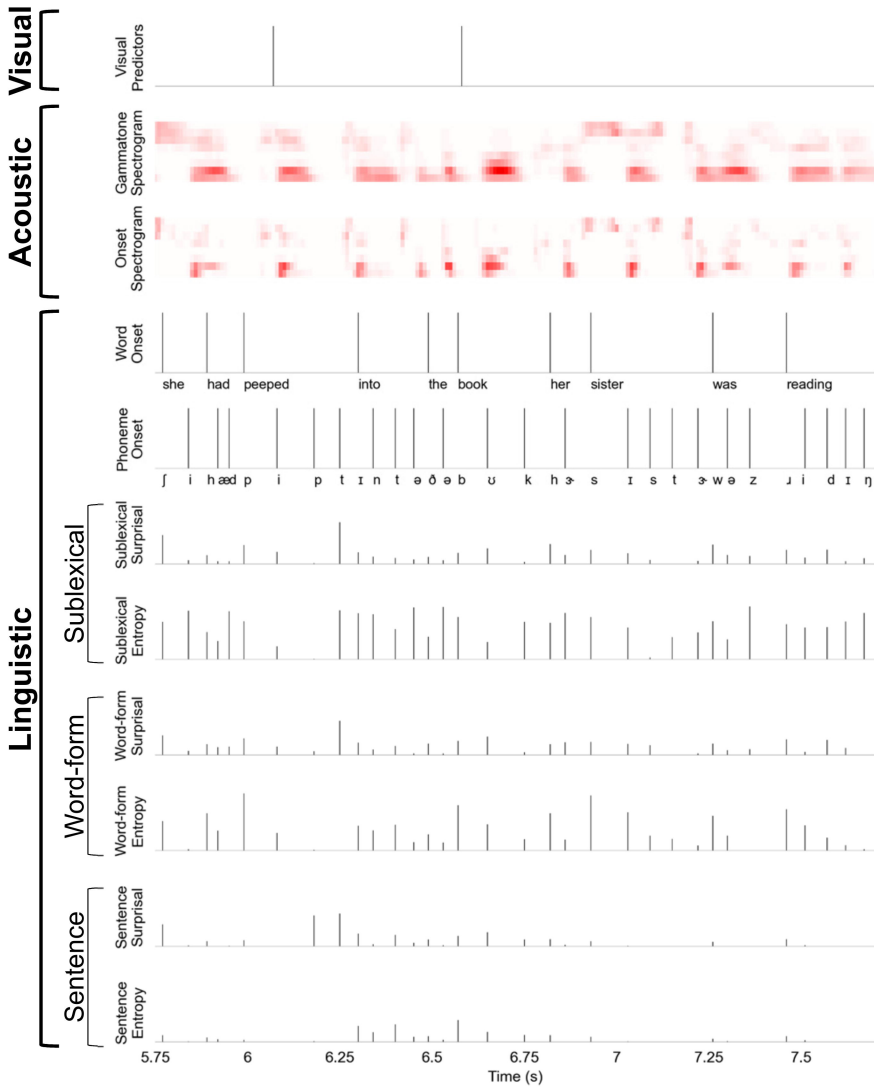

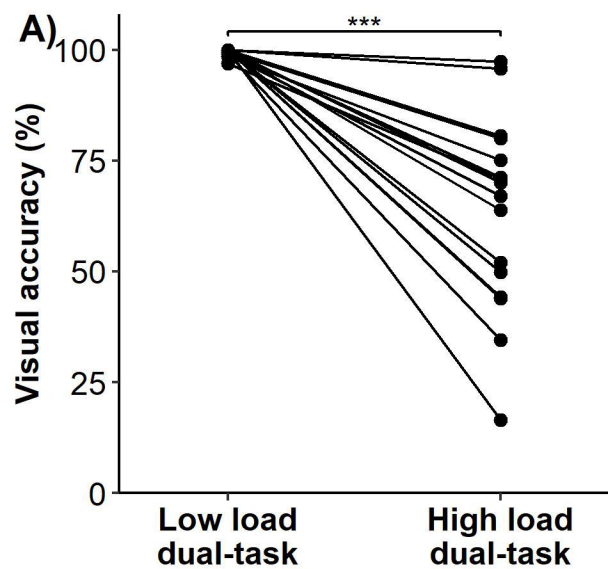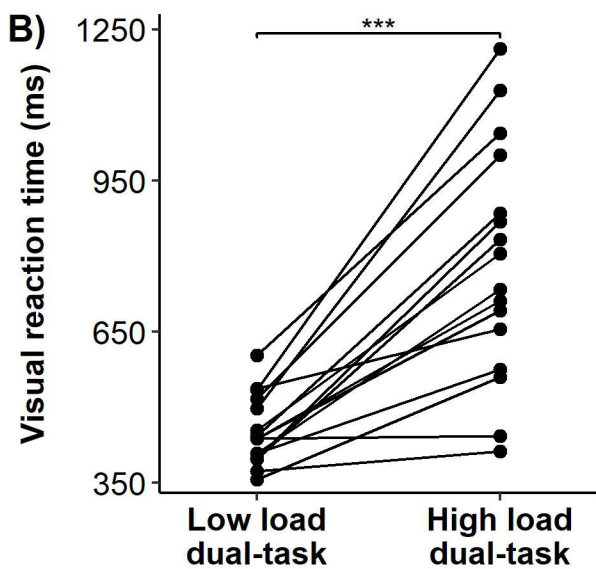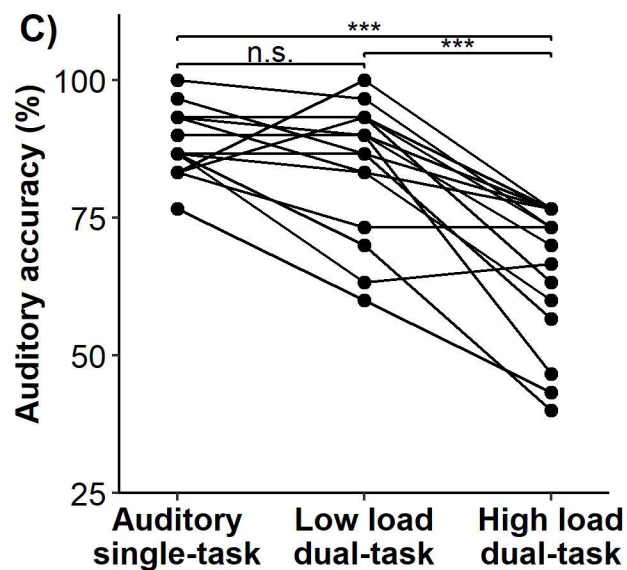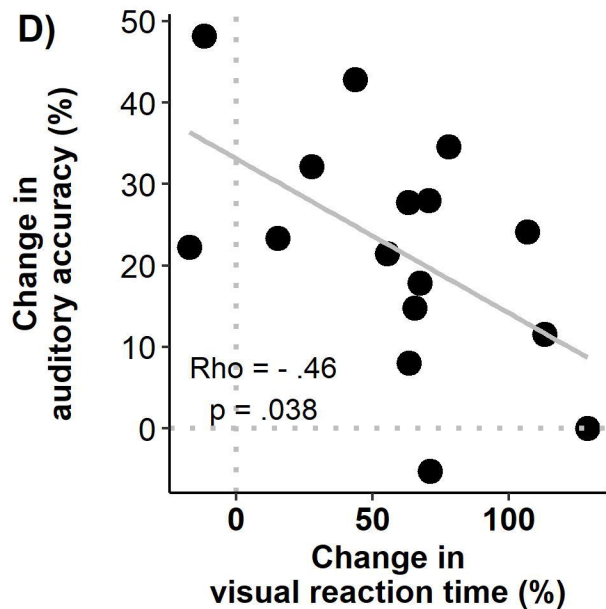



**A)**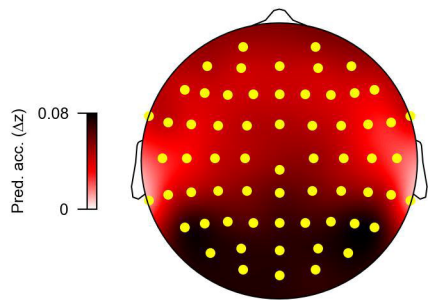**C)**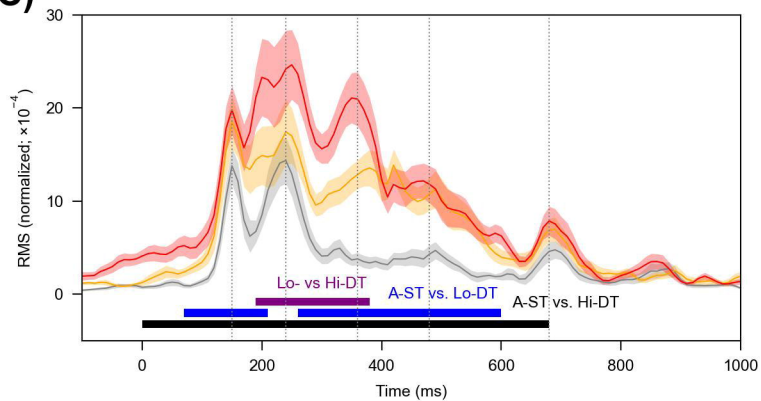**B)**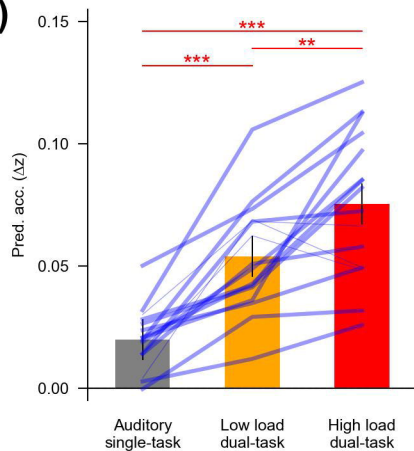**D)**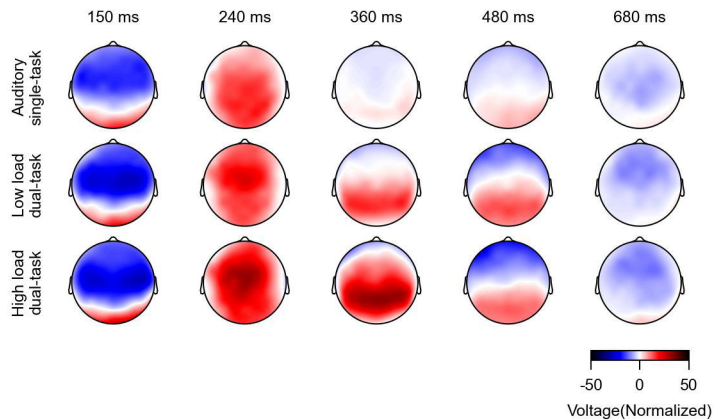

### A) (Vis+Aco+Lin) vs. (Vis+Lin)

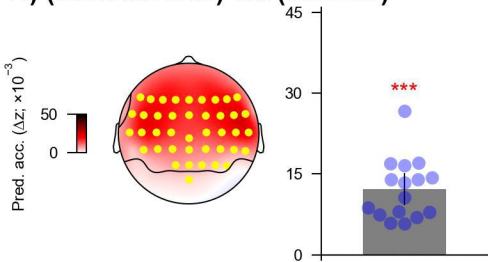

### B) Acoustic

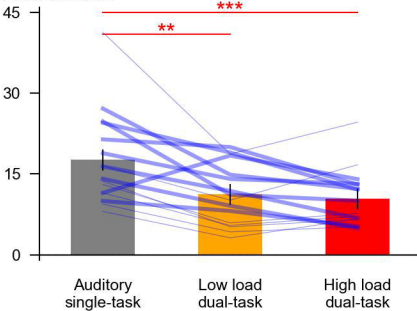

### C) Gammatone Spectrogram

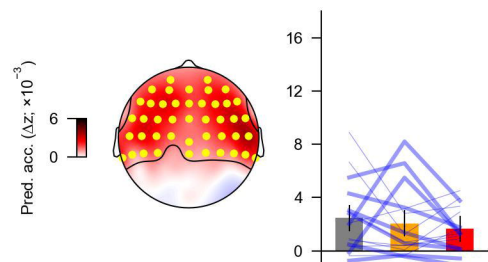

### D) Onset Spectrogram

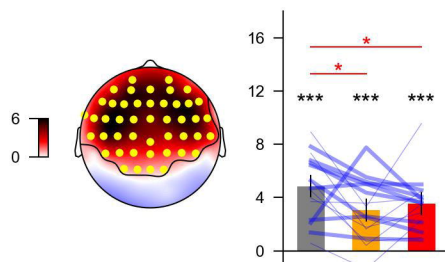

### E)

#### Gammatone Spectrogram

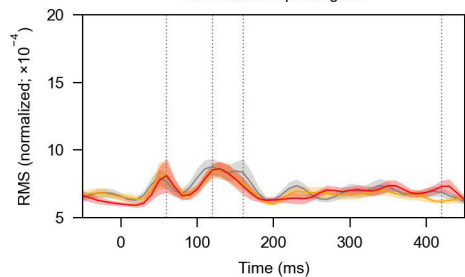

### F)

#### Onset Spectrogram

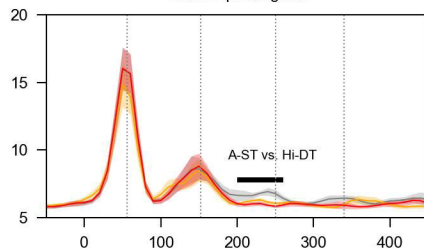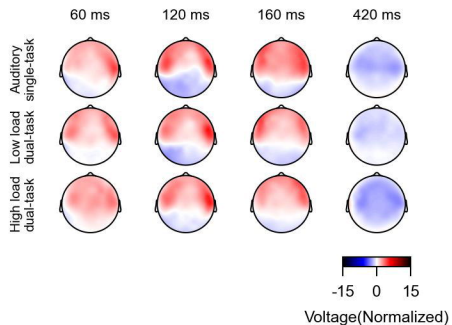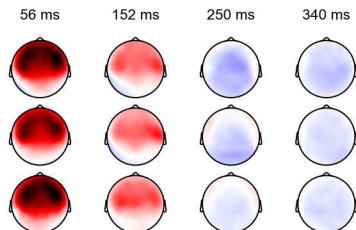

### A) (Vis+Aco+Lin) vs. (Vis+Aco)

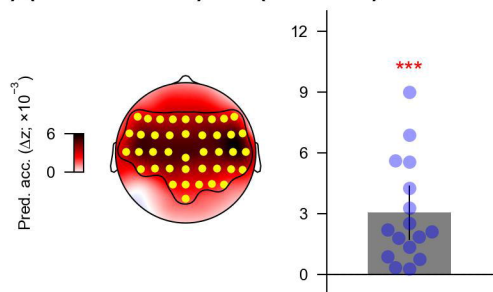

### B) Linguistic

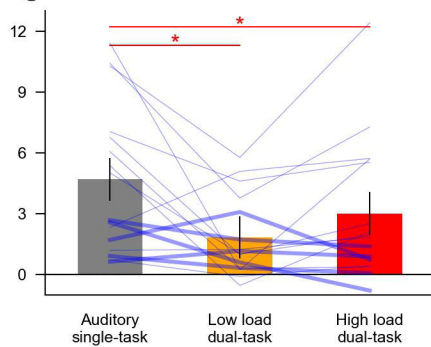

### C) Context Level

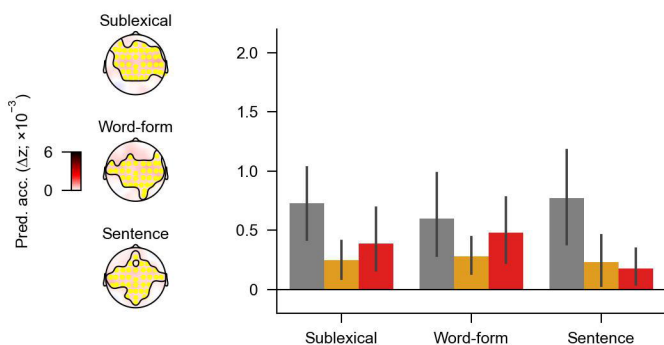

### E) Entropy vs. Surprisal

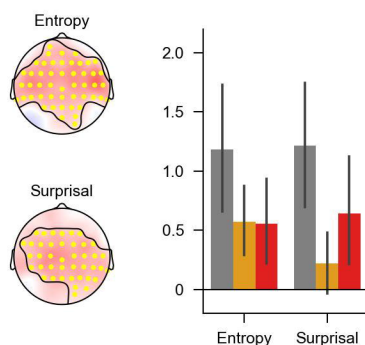

### D)

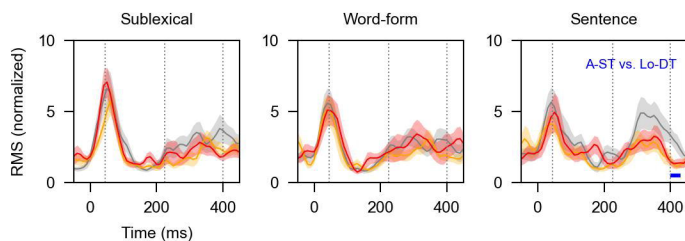

### F)

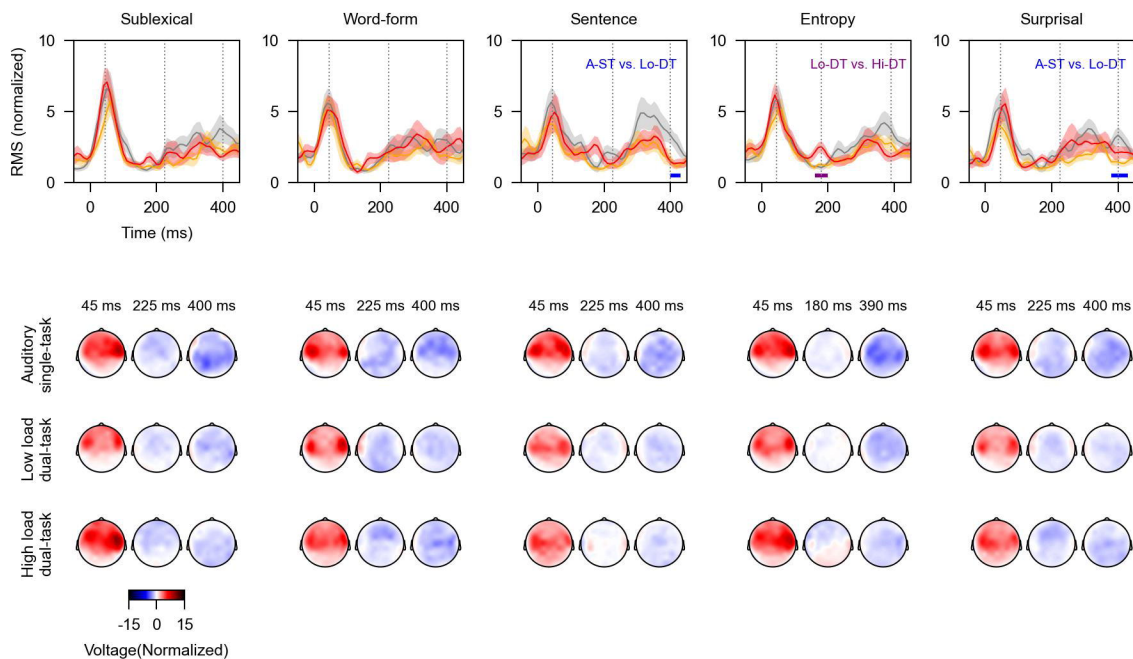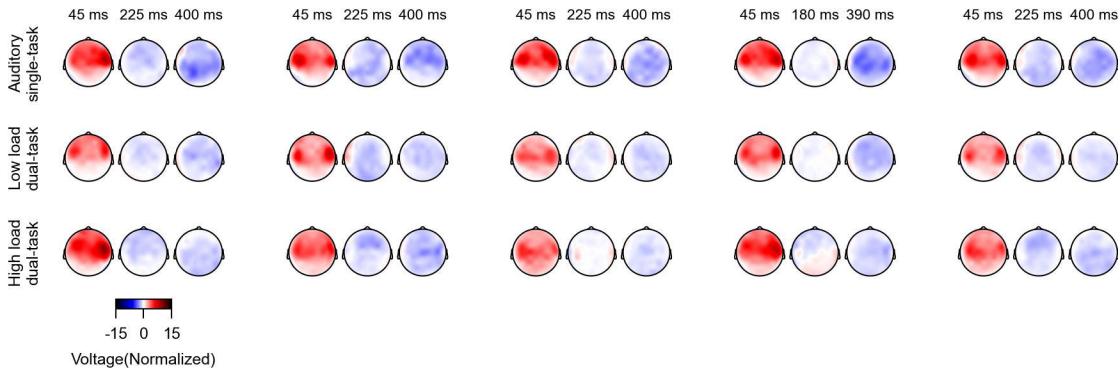

**A)**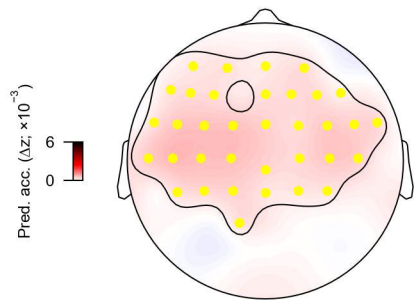**C)**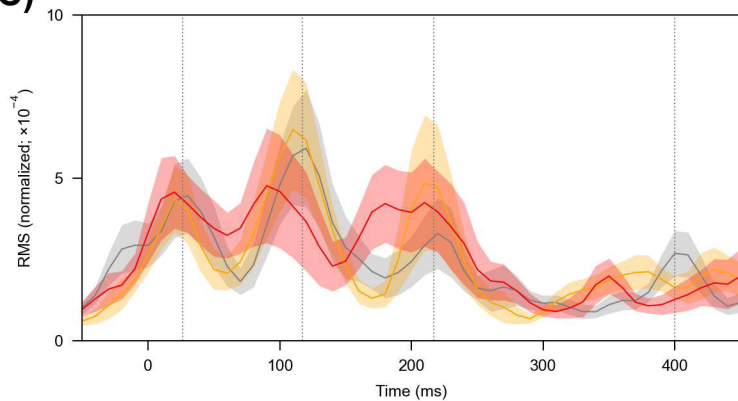**B)**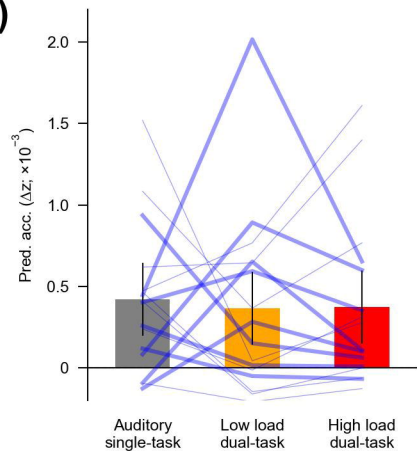**D)**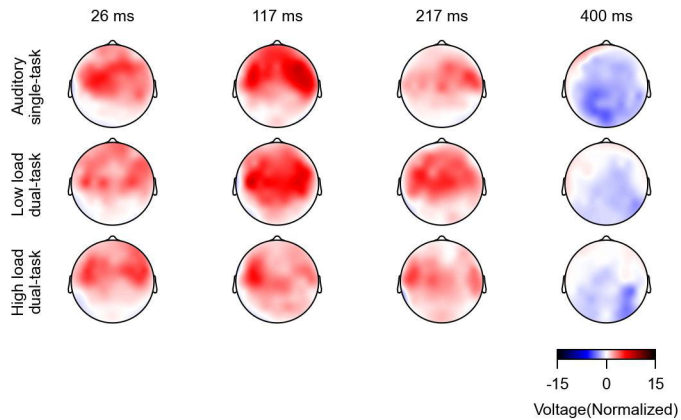

Source: https://www.biorxiv.org/content/10.1101/2022.10.29.514344v1.full.pdf
